# 1 Identifying and exploiting trait-relevant tissues with multiple functional 2 annotations in genome-wide association studies

3  
4 Xingjie Hao<sup>1,2,3</sup>, Ping Zeng<sup>2,3</sup>, Shujun Zhang<sup>1</sup>, Xiang Zhou<sup>2,3,\*</sup>  
5

6 1. Key Laboratory of Agricultural Animal Genetics, Breeding and Reproduction of Ministry of Education,  
7 Huazhong Agricultural University, Wuhan, Hubei, 430070, China

8 2. Department of Biostatistics, University of Michigan, Ann Arbor, MI 48109, USA

9 3. Center for Statistical Genetics, University of Michigan, Ann Arbor, MI 48109, USA

10 \* Correspondence to: XZ (xzhouph@umich.edu)  
11

## 12 Abstract

13  
14 Genome-wide association studies (GWASs) have identified many disease associated loci, the  
15 majority of which have unknown biological functions. Understanding the mechanism underlying  
16 trait associations requires identifying trait-relevant tissues and investigating associations in a  
17 trait-specific fashion. Here, we extend the widely used linear mixed model to incorporate  
18 multiple SNP functional annotations from omics studies with GWAS summary statistics to  
19 facilitate the identification of trait-relevant tissues, with which to further construct powerful  
20 association tests. Specifically, we rely on a generalized estimating equation based algorithm for  
21 parameter inference, a mixture modeling framework for trait-tissue relevance classification, and  
22 a weighted sequence kernel association test constructed based on the identified trait-relevant  
23 tissues for powerful association analysis. We refer to our analytic procedure as the Scalable  
24 Multiple Annotation integration for trait-Relevant Tissue identification and usage (SMART).  
25 With extensive simulations, we show how our method can make use of multiple complementary  
26 annotations to improve the accuracy for identifying trait-relevant tissues. In addition, our  
27 procedure allows us to make use of the inferred trait-relevant tissues, for the first time, to  
28 construct more powerful SNP set tests. We apply our method for an in-depth analysis of 43 traits  
29 from 28 GWASs using tissue-specific annotations in 105 tissues derived from ENCODE and  
30 Roadmap. Our results reveal new trait-tissue relevance, pinpoint important annotations that are  
31 informative of trait-tissue relationship, and illustrate how we can use the inferred trait-relevant  
32 tissues to construct more powerful association tests in the Wellcome trust case control  
33 consortium study.  
34

## 35 Key words

36 genome-wide association studies, summary statistics, functional annotations, complex traits,  
37 trait-relevant tissue, linear mixed model, generalized estimating equation, mixture model, SNP  
38 set test

## 39 **Author Summary**

40

41 Identifying trait-relevant tissues is an important step towards understanding disease etiology.  
42 Computational methods have been recently developed to integrate SNP functional annotations  
43 generated from omics studies to genome-wide association studies (GWASs) to infer trait-relevant  
44 tissues. However, two important questions remain to be answered. First, with the increasing  
45 number and types of functional annotations nowadays, how do we integrate multiple annotations  
46 jointly into GWASs in a trait-specific fashion to take advantage of the complementary  
47 information contained in these annotations to optimize the performance of trait-relevant tissue  
48 inference? Second, what to do with the inferred trait-relevant tissues? Here, we develop a new  
49 statistical method and software to make progress on both fronts. For the first question, we extend  
50 the commonly used linear mixed model, with new algorithms and inference strategies, to  
51 incorporate multiple annotations in a trait-specific fashion to improve trait-relevant tissue  
52 inference accuracy. For the second question, we rely on the close relationship between our  
53 proposed method and the widely-used sequence kernel association test, and use the inferred trait-  
54 relevant tissues, for the first time, to construct more powerful association tests. We illustrate the  
55 benefits of our method through extensive simulations and applications to a wide range of real  
56 data sets.

## 57 Introduction

58  
59 Genome-wide association studies (GWASs) have identified thousands of genetic loci associated  
60 with complex traits and common diseases. However, the majority (~90%) of these associated loci  
61 reside in noncoding regions and have unknown biological functions [1]. Systematic  
62 characterization of the biological function of genetic variants thus represents an important step  
63 for further investigating the molecular mechanisms underlying the identified disease  
64 associations. Functional characterization of genetic variants is challenging because the function  
65 and genetic effects of variants on most traits are likely acted through a tissue-specific fashion,  
66 despite their tissue-wide presence (certainly with the notable exception of somatic mutations) [2-  
67 4]. For example, it is well recognized that many psychiatric disorders, such as bipolar and  
68 schizophrenia, are consequences of dysfunctions of various genes, pathways as well as  
69 regulatory elements in neuronal and glia cells, resulting from brain-specific genetic effects of  
70 polymorphisms [5-9]. Therefore, characterizing the function of variants in various brain regions  
71 can help elucidate the biology of psychiatric disorders. For most complex traits, however, their  
72 trait-relevant tissues are often obscure. As a result, identifying trait-relevant tissues and  
73 characterizing the functions of genetic variants within relevant tissues holds the key for  
74 furthering our understanding of disease etiology and the genetic basis of phenotypic variation  
75 [10-16].

76  
77 Both experimental and computational studies have recently produced a rich resource of variant  
78 annotations that can help characterize the function of genetic variants in a tissue-dependent  
79 fashion [17-21]. For example, the ENCODE and Roadmap epigenomics projects collect various  
80 measurements of histone modification, open chromatin, and methylation from more than a  
81 hundred different tissue and cell types, where each epigenetic mark characterizes a specific  
82 aspect of variant function [22,23]. Similarly, the GTEx project produces gene expression  
83 measurements from multiple tissues and quantifies variant function in terms of its ability to  
84 regulate gene expression levels in the given tissue [24]. Besides the experimental efforts, many  
85 computational methods have also been developed to create synthetic functional annotations for  
86 variants in a tissue-dependent manner. For example, the chromHMM converts measurements of  
87 multiple histone modifications in each tissue into 15 chromatin states that have more biologically  
88 interpretable functions than the original histone occupancy based annotations [25,26]. Similarly,  
89 several other methods provide different ways to summarize multiple SNP annotations into a  
90 single, potentially more interpretable annotation for various tissues [27,28].

91  
92 With the large and growing number of tissue-specific variant annotations, however, one naturally  
93 wonders how these different annotations can be incorporated together to facilitate the  
94 identification of trait-relevant tissues. Several statistical methods have been recently developed  
95 to test the role of various functional annotations in predicting the variant effect sizes or causality  
96 for GWAS traits [10-16,29-31]. These methods often test one annotation at a time and produce a  
97 test statistic signifying the importance of the given annotation for a GWAS trait. By comparing  
98 the test statistics of univariate annotation from different tissues and ordering tissues by the  
99 magnitude of the test statistics, existing methods can be used to identify tissue relevance for a  
100 given trait [10,16]. However, examining one variant annotation at a time can be inefficient as it  
101 may fail to incorporate the rich information contained in various other annotations that likely  
102 characterize other aspects of variant function [27,28,32]. For example, some annotations are

103 designed to evaluate evolutionary conservation of a variant, while some other annotations are  
104 designed to quantify its biochemical functionality [29,33]. Even annotations that belong to the  
105 same general category may characterize substantially different functions of a variant. For  
106 example, different histone modifications are used to annotate variants by different functional  
107 genomic regions: H3K4me3 annotates promoter; H3K4me1 annotates enhancer; H3K36me3  
108 annotates transcribed regions; H3K27me3 annotates polycomb repression; H3K9me3 annotates  
109 heterochromatin; and H3K9ac annotates both enhancer and promoter [22,34]. Therefore, testing  
110 one annotation at a time may be suboptimal, and it would be ideal to incorporate multiple  
111 sources of information together to identify trait-relevant tissues. Besides the potential loss of  
112 inference efficiency, examining one annotation at a time can sometimes lead to incoherent results  
113 on the identification of trait-relevant tissues: partly due to a lack of statistical power, the trait-  
114 relevant tissues inferred by different SNP annotations may not always agree, and it is often not  
115 straightforward to consolidate results from using different annotations [27,28].

116  
117 Despite the potential inefficiency due to the use of univariate annotation tests, several studies  
118 have explored the feasibility of inferring trait-relevant tissues for various complex traits using  
119 SNP functional annotations [16,31,35,36]. While the inferred trait-tissue relevance often makes  
120 biological sense, it is unclear how to further make use of these inferred trait-relevant tissues to  
121 benefit future association studies [11,16]. In principal, leveraging the information learned from the  
122 identified trait-relevant tissues could enable powerful association tests, as the functional  
123 annotations in the trait-relevant tissues could contain important SNP causality and effect size  
124 information. In practice, however, incorporating trait-relevant tissue information into association  
125 tests is challenging, partly because the existing statistical methods for identifying trait-relevant  
126 tissues mainly rely on polygenic models [16,31,35,36] while the existing statistical methods for  
127 association tests mostly rely on univariate tests or sparse regression models [37-40]. The  
128 disparity between the methods used for trait-tissue relevance inference and the methods used for  
129 association tests make it hard to share information across the two different tasks.

130  
131 Here, we develop a simple method to address the above two challenges. First, we incorporate  
132 multiple binary and/or continuous annotations to facilitate the identification of trait-relevant  
133 tissues for GWAS traits. To do so, we modify the commonly used linear mixed model [38,41-45]  
134 to relate variant effect sizes to variant annotations by introducing variant specific variance  
135 components that are functions of multiple annotations. We quantify and evaluate the joint  
136 contribution of multiple annotations to genetic effect sizes by performing parameter inference  
137 using the widely used generalized estimation equation (GEE) [46]. Our GEE-based algorithm is  
138 closely related to the recent LDSC [16], ployGEE [47], and MQS methods [48], allows for the  
139 use of summary statistics, and naturally accounts for the correlation among summary statistics  
140 due to linkage disequilibrium. With GEE statistics, we further apply mixture models to classify  
141 tissues into two categories -- those that are relevant to the trait and those that are not -- thus  
142 formulating the task of identifying trait-relevant tissues into a classification problem. Second, our  
143 method is closely related to the sequence kernel association test (SKAT) [49-51], and this  
144 relationship allows us to apply parameter estimates from the inferred trait-relevant tissues as SNP  
145 weights to construct SNP set test and power new association studies. We refer to our overall  
146 analytic procedure as the Scalable Multiple Annotation integration for trait-Relevant Tissue  
147 identification (SMART). We provide an overview of our method in the **Materials and Methods**  
148 section, with details described in the **Supplementary Text**. With simulations, we show that,

149 compared with analyzing one annotation at a time, analyzing multiple annotations jointly can  
150 improve power for the identification of trait-relevant tissues. In addition, we show that, using  
151 parameter estimates from inferred trait-relevant tissues as SNP weights leads to more powerful  
152 SNP set tests than the standard SKAT [49-51]. We apply our method for an in-depth analysis of  
153 43 GWAS traits with multiple functional annotations in more than one hundred tissues derived  
154 from ENCODE and Roadmap. We show how our method and analysis can help provide  
155 biological insights for the genetic basis of complex traits and benefit future association studies.  
156 The SMART method is implemented as an R package, freely available at  
157 <http://www.xzlab.org/software.html>.

## 158 **Materials and Methods**

159

### 160 **Method Overview**

161

162 We consider a simple extension of the linear mixed model to evaluate jointly the contribution of  
163 multiple SNP annotations. To do so, we first consider the following multiple linear regression  
164 model that relates genotypes to phenotypes

$$y = X\beta + \epsilon, \quad \epsilon_i \sim N(0, \sigma_\epsilon^2), \quad (1)$$

165 where  $y$  is an  $n$ -vector of phenotypes;  $X$  is an  $n$  by  $m$  matrix of genotypes;  $\beta$  is an  $m$ -vector of  
166 effect sizes; and  $\epsilon$  is an  $n$ -vector of residual errors; each element  $\epsilon_i$  is independent and identically  
167 distributed from a normal distribution with variance  $\sigma_\epsilon^2$ . We center the phenotype  $y$  and  
168 standardize each column of the genotype matrix  $X$  to have zero mean and unit variance, allowing  
169 us to ignore the intercept in the model.

170

171 Because  $p \gg n$ , we have to make further modeling assumptions on the SNP effect sizes  $\beta$  to  
172 make the model identifiable. We do so by incorporating SNP annotation information and making  
173 the effect size  $\beta_j$  of  $j$ -th SNP depending on its annotations. Specifically, we assume that all SNPs  
174 are characterized by a same set of  $c$  annotations. For the  $j$ -th SNP, we denote  
175  $A_j = (1, C_{j1}, C_{j2}, \dots, C_{jc})^T$  as a  $(c+1)$ -vector of realized annotation values including a value of one  
176 that corresponds to the intercept. These annotations can be either discrete or continuous. For  
177 example, one annotation could be a binary indicator on whether the SNP resides in exonic  
178 regions, while another annotation could be a continuous value of the CADD score [18] of the  
179 SNP. Because our model includes an intercept (more details in the next paragraph), we require  
180 that any linear combination of these annotations does not sum to a vector of one's across SNPs in  
181 order to avoid identifiability issues – a requirement holds for standard linear regression models.  
182 For example, we cannot include two non-overlapping annotations that form a partition of the  
183 genome (i.e.  $C_{j1} = 1$  when  $C_{j2} = 0$ , and  $C_{j1} = 0$  when  $C_{j2} = 1$ ). Our coding scheme is  
184 conventionally referred to as the reference coding scheme. To simplify presentation, we assemble  
185 the annotation vectors across all SNPs into an  $m$  by  $(c+1)$  annotation matrix  $A$ , where each row  
186 contains the annotation vector for the corresponding SNP.

187

188 We assume that the annotations for a given SNP influence its effect size. In particular, we assume  
189 that each effect size  $\beta_j$  is independent and follows a normal distribution with mean zero and a  
190 variance  $\sigma_j^2$  that is SNP specific. The SNP-specific variance assumption generalizes the standard  
191 LMM assumption where every SNP is assumed to share a common variance [37,52]. We further  
192 impose an extra layer of hierarchy by assuming that the SNP specific variance is a function of the  
193 annotation vector, or

$$\beta_j \sim N(0, \sigma_j^2/m), \quad \sigma_j^2 = A_j \alpha^*, \quad (2)$$

194 where  $\alpha^* = \begin{pmatrix} \alpha_0 \\ \alpha \end{pmatrix}$  is a  $(c+1)$ -vector of coefficients that include an intercept  $\alpha_0$  and a  $c$ -vector of  
195 annotation coefficients  $\alpha$ . Each annotation coefficient is large when the corresponding annotation  
196 is predictive of the SNP effect size. Therefore, the annotation coefficients can be used to evaluate  
197 the importance of annotations. Above, we center the 2<sup>nd</sup> to the  $(c+1)$ -th columns of the annotation  
198 matrix  $A$  to have mean zero across SNPs. After centering, the ratio  $m\alpha_0/(m\alpha_0 + \sigma_\epsilon^2)$  has the  
199 natural interpretation of SNP heritability, which is defined as  $h^2 = E(\sum \beta_j^2)/(E(\sum \beta_j^2) + \sigma_\epsilon^2)$ ,

200 roughly following [16], where  $E$  represents prior expectation. The intercept  $\alpha_0$  effectively  
201 determines how large a typical SNP effect size would be, while the other annotation coefficients  
202 determine how the SNP effect size variance would vary around the average depending on what  
203 annotations the SNP has. Note that the assumed linear relationship between the SNP specific  
204 variance and annotations also naturally extends the modeling assumptions made in LDSC [16]  
205 and MQS [48], both of which examine one annotation at a time in the presence of multiple  
206 binary annotations, though LDSC has also been recently extended to examine one annotation at a  
207 time in the presence of continuous annotations [31]. In addition, our polygenic modeling  
208 assumption complements alternative approaches in using sparse models for integrating functional  
209 annotations [11,12,40,53].

210  
211 For inference on the annotation coefficients ( $\alpha$ ), we follow the main idea of LDSC and MQS in  
212 using the marginal  $\chi^2$  statistics. Using marginal statistics allows our method to be applied to data  
213 where only summary statistics are available. Unlike the detailed algorithms of LDSC or MQS  
214 that were initially designed to examine one annotation at a time in the presence of multiple  
215 binary annotations, however, we applied the generalized estimating equation (GEE) [46,54]  
216 inference method that allows for the joint inference of multiple binary and continuous  
217 annotations (details in [Supplementary Text](#)). GEE is widely used for modeling correlated data  
218 and is particularly suitable here to account for the correlation among the marginal  $\chi^2$  statistics  
219 due to linkage disequilibrium. In the case of binary annotations, the results of our GEE on each  
220 annotation by using a diagonal matrix as the working covariance matrix can reduce to that of  
221 LDSC and MQS, while the results of our GEE by using an LD based general working covariance  
222 matrix can reduce to that of polyGEE [47]. Importantly, just like other summary statistics based  
223 methods, GEE inference can be carried out using summary statistics that include marginal  $\chi^2$   
224 statistics and the  $m$  by  $m$  SNP correlation matrix. The SNP correlation matrix can be obtained  
225 from a reference panel, by using, for example, the genotypes from the 1,000 Genomes Project  
226 [55]. To facilitate both computation and memory storage, we further approximate the SNP  
227 correlation matrix by a block diagonal matrix (details in [Supplementary Text](#)), allowing us to  
228 capture the main block-wise linkage disequilibrium pattern commonly observed in the human  
229 genome [40,56-58]. Finally, with GEE, we obtain both point estimates  $\hat{\alpha}$  and their variance  $V(\hat{\alpha})$   
230 for all annotation coefficients in a closed form. We can then compute the multivariate Wald  
231 statistic  $\hat{\alpha}^T V(\hat{\alpha})^{-1} \hat{\alpha}$  which can be used as a measurement of trait-tissue relevance.

232  
233 Previous approaches to identify trait-relevant tissues examines one (univariate) Wald statistics at  
234 a time, and uses an asymptotic normal test to obtain a p-value to identify significant trait-tissue  
235 pairs. Because one annotation in one tissue is often highly correlated with the same annotation in  
236 other tissues as well as other annotations in other tissues, the p-values for even the trait-irrelevant  
237 tissues are often significant due to the annotation correlation across annotations and tissues.  
238 Indeed, as previous studies have shown, even in simple simulations, trait-irrelevant tissues can be  
239 falsely identified as trait-relevant in 20% of the simulation replicates [16]. As a consequence,  
240 previous studies have to use a set of baseline annotations as covariates to reduce the cross-tissue  
241 correlation among annotations, thus reducing false positives. However, it is often unclear how  
242 many and what types of baseline variables one should include for a given data set: using a small  
243 number of baseline covariates may not control for false positives well, while using a large  
244 number of covariates may reduce the power to detect the true trait-relevant tissues. Indeed, the  
245 use of baseline variables seems to be highly dependent on data sets (with varying sample sizes

246 and SNP numbers), and needs adjustment in different data sets to achieve sensible results [16].

247  
248 Here, we present an alternative strategy for identifying trait-relevant tissues. Specifically, for  
249 each trait in turn, we model the multivariate Wald statistics across tissues with a mixture of two  
250 non-central chi-squared distributions to classify tissues into two groups. The two non-central chi-  
251 squared distributions have the same degrees of freedom that equals to the number of annotations  
252 fitted in GEE (i.e.  $c$ ), but different noncentrality parameters. The chi-squared distribution with  
253 the small noncentrality parameter represents the empirical null distribution that contains tissues  
254 irrelevant to the trait. The small, nonzero, noncentrality parameter characterizes the fact that  
255 these irrelevant tissues tend to have Wald statistics larger than what would be expected under the  
256 theoretical null distribution (i.e. central chi-squared) simply due to annotation correlation across  
257 tissues. In contrast, the chi-squared distribution with the large non-central parameter represents  
258 the alternative model that contains tissues relevant to the trait. The large noncentrality parameter  
259 characterizes the fact that these relevant tissues tend to have Wald statistics larger than those  
260 from the irrelevant tissues. By classifying tissues into two groups, we can identify tissues with  
261 strong trait-relevance without the need to explicitly model the empirical null distribution using a  
262 data generative model. Therefore, our strategy effectively formulates the task of identifying trait-  
263 relevant tissues as a classification problem instead of a testing problem. By modeling the  
264 empirical null distribution directly, we can reduce false discoveries and potentially gain power at  
265 a given false discovery rate (FDR). We also note that this classification strategy follows closely  
266 recent applications of mixture models to estimate the empirical null distribution in other  
267 genomics settings [59,60]. Technically, we use the expectation-maximization (EM) algorithm to  
268 fit the mixture model and infer the two noncentrality parameters as well as the proportion of  
269 alternatives from data at hand (details in the [Supplementary Text](#)). For each tissue in turn, we  
270 then obtain the inferred posterior probability (PP) of it being in the alternative model as its  
271 evidence for trait-relevance. We use these inferred posterior probabilities (ranging between 0 and  
272 1) for all following analyses. Note that while our linear mixed model itself does not explicitly  
273 model the correlation structure among annotations across tissues by incorporating all annotations  
274 from all tissues into a single model, our mixture model and classification strategy can implicitly  
275 account for the annotation correlation across tissues.

276  
277 Finally, we ask the question of how to make use of the inferred trait-relevant tissues to enable  
278 more powerful future association studies. We note that our model defined in equations (1) and  
279 (2) is closely related to the sequence kernel association test (SKAT) model [49-51] for SNP set  
280 test. In particular, the SNP specific variance  $\sigma_j^2$  in our model can be naturally interpreted as the  
281 SNP specific weight in the SKAT [49-51] framework. Because of this close relationship between  
282 our model and SKAT [49-51], we propose to use the estimated SNP specific variance  $\hat{\sigma}_j^2$  in the  
283 top trait-relevant tissue from our model as SNP weights to perform SKAT [49-51] analysis in  
284 new association studies. Intuitively, if a SNP tends to have a large effect size, then weighting it  
285 high in the subsequent SNP set analysis can help achieve greater association mapping power. We  
286 examine this intuition with both simulations and real data applications. Note that our weighted  
287 SKAT [49-51] approach is related to a recent method, FST, which also extends SKAT to  
288 accommodate multiple functional annotations [32]. However, our method borrows information  
289 across all SNPs to infer trait-relevant tissues and estimate annotation coefficients, and further  
290 relies on the estimated annotation coefficients in the trait-relevant tissues to construct SNP  
291 specific weights for SKAT analysis. In contrast, FST [32] examines one gene at a time, calculates



292 a test statistic for each annotation in turn, and effectively chooses the minimal test statistics  
293 among all these annotations as the final statistics for testing. In addition, while our method is  
294 polygenic in nature, the idea of using SNP specific weights to construct test statistics is also  
295 related to a recent study that uses functional annotations to design SNP specific weights in sparse  
296 regression models to improve disease risk prediction performance [61].

297

## 298 **Tissue-Specific SNP Annotations**

299

300 We used tissue-specific SNP annotations from the ENCODE [23] and the Roadmap [22] projects  
301 in the present study. Specifically, we downloaded the broadPeak files from the Roadmap  
302 Epigenomics web portal ([http://egg2.wustl.edu/roadmap/web\\_portal/](http://egg2.wustl.edu/roadmap/web_portal/)). The broadPeak files  
303 contain peak regions for four histone marks (H3K27me3, H3K36me3, H3K4me1, H3K4me3)  
304 from 16 cell lines in the ENCODE project and 111 tissues from the Roadmap project (release 9).  
305 Among the 127 tissue/cell types, we excluded ESC, iPSC, and ES-derived cell lines to focus on  
306 the remaining 105 tissue/cell types (Table S1). Following previous studies [16,22,27], we further  
307 classified 105 tissues into 10 tissue groups based on anatomy (BloodImmune, Adipose,  
308 AdrenalPancreas, BoneConnective, Cardiovascular, CNS, Gastrointestinal, Liver, Muscle, Other;  
309 Table S1). For each tissue and each histone mark in turn, we created a binary histone mark  
310 annotation indicating whether the SNP resides inside the peak regions of the histone mark. The  
311 average proportions of SNPs residing in each of the four mark labeled regions across the 105  
312 tissues are 25.75% for H3K27me3, 18.51% for H3K36me3, 17.98% for H3K4me1, 10.69% for  
313 H3K4me3 (Table S1). In addition to the binary annotations, for each tissue group and each  
314 histone mark in turn, we averaged the binary annotation indicator across all tissue types within  
315 the tissue group and used the average value as a new, continuous, tissue group level histone mark  
316 annotation. Therefore, we obtained both tissue-specific binary histone mark annotations and  
317 tissue-group-specific continuous histone mark annotations.

318

319 Besides the above histone mark annotations, we also obtained SNP annotations based on 15  
320 chromatin states (TssA, TssAFlnk, TxFlnk, Tx, TxWk, EnhG, Enh, ZNFRpts, Het, TssBiv,  
321 BivFlnk, EnhBiv, ReprPC, ReprPCWk and Quies) inferred from ChromHMM [62] in the 105  
322 tissues. In particular, we downloaded the posterior probabilities of each of the 15 states for each  
323 genomic location in different tissues from the Roadmap Epigenomics web portal. For each tissue  
324 group and each posterior probabilities in turn, we then averaged the posterior probabilities across  
325 all tissue types within the tissue group and used the average value tissue as tissue group specific  
326 continuous ChromHMM annotation.

327

## 328 **Simulations**

329

330 We performed two sets of simulations to illustrate the benefits of our method in terms of (1)  
331 using multiple SNP annotations and (2) enabling more powerful SNP set tests. For all  
332 simulations, we used real genotypes from the Genetic Epidemiology Research Study on Adult  
333 Health and Aging (GERA; dbGaP accession number phs000674.v2.p2) [63,64]. The original  
334 genotype data of the GERA study consists of 675,367 SNPs on 62,313 individuals. We removed  
335 SNPs with a missingness percentage above 0.05, a minor allele frequency (MAF) below 0.05,  
336 and a Hardy-Weinberg equilibrium test p-value below  $10^{-4}$ . We then randomly selected 10,000  
337 individuals with European ancestry, and obtained the first 27,640 (or 10,000) SNPs on

338 chromosome one to perform the first (or the second) set of simulations.

339

340 For the first set of simulations, we obtained two histone marks (H3K4me1 and H3K4me3) from  
341 ten different tissue groups from the ENCODE and Roadmap projects, and used them as SNP  
342 annotations (details in the previous subsection). Among the ten tissue groups, we randomly  
343 selected one as the trait-relevant tissue group in each simulation replicate. We designated all  
344 SNPs to be causal, and simulated the causal SNP effects independently from a normal  
345 distribution with a SNP-specific variance determined by annotations in the trait-relevant tissue.  
346 In particular, we set the variance intercept (i.e.  $\alpha_0$ ) to be 0.1 and we varied each of the two  
347 annotation coefficients (i.e.  $\alpha_1, \alpha_2$ ) from -0.1 to 0.5 (-0.1/0/0.05/0.1/0.25/0.5) to cover a range of  
348 possible values estimated from real data (details in [Real Data Applications](#)). We performed 1,000  
349 simulation replicates for each combination of the two annotation coefficients ( $\alpha_1, \alpha_2$ ). Note that  
350 the median estimates of the two annotations across 43 GWAS traits (details in [Real Data](#)  
351 [Applications](#)) is close to  $(\alpha_1, \alpha_2)_m = (0.1, 0.05)$ . We simulated the residual errors from a normal  
352 distribution with variance 0.9, so that the resulting trait has a SNP heritability of 0.1, which  
353 corresponds to the median SNP heritability estimate across 43 traits in the real data analysis. We  
354 then summed all genetic effects and the residual errors together to form the simulated  
355 phenotypes. With genotypes and simulated phenotypes, we fitted a linear regression model for  
356 one SNP at a time and computed marginal  $\chi^2$  statistics. We further paired these marginal  
357 statistics with a SNP correlation matrix estimated using 503 individuals of European ancestry  
358 from the 1,000 Genomes Project [55]. We then examined the ten candidate tissues in turn using  
359 either two annotations together or one annotation at a time. For additional comparisons at the  
360 median setting  $(\alpha_1, \alpha_2)_m = (0.1, 0.05)$ , we also included LDSC [16], which in default includes  
361 75 baseline annotations as covariates. We used this first set of simulations for two purposes. In  
362 the [Supplementary Text](#), we used simulations to illustrate the benefits of using mixture models to  
363 post-process the Wald statistics in order to address correlations among annotations and reduce  
364 false positives ([Figure S1](#)). In the main text, we used simulations to illustrate the benefits of  
365 modeling multiple annotations jointly.

366

367 For the second set of simulations, we used 10,000 SNPs and divided them into 100 blocks with  
368 100 SNPs inside each block. For the null simulations, we set the effect sizes of all SNPs to be  
369 zero and performed 50,000 simulation replicates. For the alternative simulations, we randomly  
370 selected 10 non-adjacent blocks as causal blocks and we randomly selected 20% SNPs inside  
371 these causal blocks to be causal SNPs (i.e. a total of 200 causal SNPs). We then simulated ten  
372 tissue-specific annotation sets, each with two annotations, which are simulated to correlate with  
373 SNP causality [30]. Specifically, the annotation values for the non-causal SNPs are sampled from  
374 a normal distribution with mean 0 and variance 1. The causal SNPs are randomly divided into  
375 three groups: for the first annotation, its annotations values for the first group are sampled from a  
376 normal distribution with mean 0 and variance 1 while its annotations values for the second and  
377 third groups are sampled from a normal distribution with mean 10 and variance 1; for the second  
378 annotation, its annotations values for the second group are sampled from a normal distribution  
379 with mean 0 and variance 1 while its annotations values for the first and third groups are sampled  
380 from a normal distribution with mean 10 and variance 1. The proportion of the three groups of  
381 causal SNPs are set to be either (1/2, 1/2, 0), (1/3, 1/3, 1/3) or (0, 0, 1). Because two annotations  
382 share similar annotation values in the third group of causal SNPs, the proportion of the third  
383 group determines the correlation between the two annotations for causal SNPs within the

384 annotation set. Therefore, the selected proportion of the third group SNPs being 0, 33% and  
385 100% correspond to low, median and high correlation between the two annotations in causal  
386 SNPs, respectively. Once we had the annotations, we simulated the effect sizes for causal SNPs  
387 independently from a normal distribution with a SNP-specific variance determined by the  
388 designated annotation set. Specifically, we set  $\alpha_0 = 0.5$  and chose either  $(\alpha_1, \alpha_2) = (0.4, 0.4)$  (in  
389 the case of two informative annotations) or  $(\alpha_1, \alpha_2) = (0.4, 0)$  (in the case of one informative  
390 annotation). These parameters were selected to ensure that the 10 causal blocks explain a large  
391 proportion of variance in phenotypes (per-block PVE > 0.01; **Figure S2**) so that we will have  
392 reasonable power to detect them. Certainly, power is a continuous function of per-block PVE and  
393 is non-zero even for small values of per-block PVE. We simulated the residual errors from a  
394 normal distribution with variance 0.5. We summed all genetic effects and the residual errors  
395 together to form the simulated phenotypes. We then randomly divided the 10,000 individuals into  
396 two sets: a training set with 7,000 individuals and a test set of 3,000 individuals. In the training  
397 set, we followed the same procedure described in the previous paragraph to obtain marginal  $\chi^2$   
398 statistics in the data and SNP correlation matrix from a reference panel to fit our model. We  
399 applied the parameter estimates from the best trait-relevant tissue determined in the training set  
400 to compute the SNP specific variance  $\hat{\sigma}_j^2$  as SNP weights. For the computed variance, we  
401 subtracted from them the minimal variance across SNPs and added a small constant ( $10^{-15}$ ) to  
402 ensure that all weights are positive. We then multiplied the resulting SNP weights with the  
403 posterior probability (PP) of the best trait-relevant tissue and further added a value of 1-PP to all  
404 SNPs, thus effectively obtaining a set of averaged SNP weights by using both the constructed  
405 SNP weights in the identified trait-relevant tissue and the equal SNP weights. Averaging the  
406 constructed weights and the equal weights using PP ensures the robustness of our method and  
407 guards against the special case where none of the tissues are trait-relevant: in this case, the  
408 resulting SNP weights would equal to the equal weights due to a small PP value and would thus  
409 still be effective in the subsequent SNP set analysis. We finally applied the SNP weights  
410 constructed in the training data to the test data to perform SNP set analysis. We performed 1,000  
411 simulation replicates for each alternative simulation setting. We divided these replicates into 10  
412 sets, each with 100 replicates, and computed the power to detect the causal blocks in each set.  
413 We report the mean and variance of these power values across 10 sets.

414

## 415 **GWAS Summary Statistics**

416

417 We obtained summary statistics in the form of marginal z-scores for 43 traits from 28 GWAS  
418 studies. Details are provided in **Table S2**. These studies collect a wide range of complex traits  
419 and diseases that can be classified into six phenotype categories [28,65]: anthropometric traits  
420 (e.g. height and BMI), hematological traits (e.g. MCHC and RBC), autoimmune diseases (e.g.  
421 CD and IBD), neurological diseases (e.g. Alzheimer's disease and Schizophrenia), metabolic  
422 traits (e.g. FG and HDL), and social traits (e.g. ever smoked and college completion). We  
423 removed SNPs within the major histocompatibility complex (MHC) region (Chr6: 25Mb-34Mb)  
424 following [16]. We then intersected the SNPs from all the studies and retained a common set of  
425 622,026 SNPs for analysis. We paired the marginal z-scores from these studies with the SNP  
426 correlation matrix estimated using 503 individuals of European ancestry from the 1,000  
427 Genomes Project [55] for inference. Finally, after the analysis, we computed correlation among  
428 traits in terms of their tissue relevance and used the Bayesian information criterion (BIC)  
429 implemented in the clustering package mclust [66] in R with the standard option EEI to classify

430 traits. Clustering with BIC automatically inferred a total of five main trait clusters.

431

## 432 **Investigate Trait-Tissue Relevance via PubMed Search**

433

434 We rely on previous literature to partially validate the inferred trait-relevant tissue results in real  
435 data. We reasoned that, if a tissue is indeed relevant to a given trait, then there would be  
436 extensive prior biomedical researches carried out on the tissue for the trait. Therefore, the  
437 number of previous publications on a trait-tissue pair can serve as a useful indicator on the  
438 potential relevance and importance of the tissue for the trait. To estimate the number of previous  
439 publications on trait-tissue pairs, we conducted a literature search on PubMed  
440 (<https://www.ncbi.nlm.nih.gov/pubmed/>). Specifically, for each trait-tissue pair, we used the  
441 names of trait and tissue as input and counted the number of publications that contain the input  
442 values either in the abstract or in the title. For traits, we used trait names directly. For tissues, we  
443 excluded the “Other” tissue group and focused on the nine remaining tissue groups. For these  
444 remaining tissue groups, we used the following key words in addition to the tissue group name in  
445 the PubMed search: (1) CNS: brain, central nervous system, neuron, glia and CNS; (2)  
446 BloodImmune: blood, T-cell, B-cell, thymus and immune system; (3) Adipose: adipose. (4)  
447 AdrenalPancreas: adrenal, pancreas; (5) BoneConnective: bone, fibroblast and connective tissue;  
448 (6) Cardiovascular: heart, cardiovascular; (7) Gastrointestinal: gastrointestinal, esophagus,  
449 stomach, intestine and rectum; (8) Liver: liver; (9) Muscle: muscle. For example, for the  
450 schizophrenia-CNS trait-tissue pair, we conducted the search by using “schizophrenia  
451 [Title/Abstract] AND (CNS [Title/Abstract] OR brain [Title/Abstract] OR central nervous system  
452 [Title/Abstract] OR neuron [Title/Abstract] OR glia [Title/Abstract])”, which yielded 17,720 hits.  
453 The number of publications on each trait-tissue pair from the PubMed search is listed in **Table S3**  
454 (the search was carried out on June 23, 2017). For each trait in turn, we further normalized the  
455 data by dividing the number of publications for a tissue by the total number of publications  
456 across all tissues for the trait. We used the resulting proportion for the final analysis.

457

## 458 **SNP Set Test in WTCCC**

459

460 Because of the close relationship between our method and the sequence kernel association test  
461 (SKAT [49-51]) (details in **Method Overview**), we propose to use the estimated SNP specific  
462 variance in the top trait-relevant tissue from our method as SNP weights in SKAT [49-51] to  
463 perform SNP set test in new association studies. To examine the utility of this association  
464 mapping strategy in real data, we estimated annotation coefficients in consortium studies, applied  
465 them to construct SNP weights (details in the above Simulations subsection), with which we  
466 performed SKAT [49-51] for the corresponding traits in the Wellcome Trust Case Control  
467 Consortium (WTCCC) study [67]. The WTCCC data consists of about 14,000 cases from seven  
468 common diseases and 2,938 shared controls. The cases include 1,963 individuals with type 1  
469 diabetes (T1D), 1,748 individuals with Crohn's disease (CD), 1,860 individuals with rheumatoid  
470 arthritis (RA), 1,868 individuals with bipolar disorder (BD), 1,924 individuals with type 2  
471 diabetes (T2D), 1,926 individuals with coronary artery disease (CAD), and 1,952 individuals  
472 with hypertension (HT). We excluded HT and considered the remaining six diseases for which  
473 we had summary statistics in other larger consortium studies. We obtained quality controlled  
474 genotypes from WTCCC [67] and imputed missing genotypes using BIMBAM [68] to obtain a

475 total of 458,868 SNPs that are shared across all individuals. The genotypes were further imputed  
476 by SHAPEIT [69,70] and IMPUTE2 [71] with the 1,000 Genomes Project [55] as a reference.  
477 We removed SNPs with a Hardy-Weinberg equilibrium p-value  $< 10^{-4}$  or a minor allele  
478 frequency  $< 0.05$ , and intersected SNPs from WTCCC with the consortium data to obtain a final  
479 set of 335,170 overlapped SNPs. Meanwhile, we obtained genome locations for a set of 19,189  
480 protein coding genes from GENCODE project [72]. We intersected SNPs with these genes and  
481 identified gene-harboring SNPs that reside within 10 kb upstream of the transcription start site  
482 and 10 kb downstream of the transcription end site. To perform gene-set test, we focused on  
483 5,588 genes that have at least 10 SNPs, with an average of 29.6 SNPs inside each gene and a  
484 total of 153,813 gene-harboring SNPs. For each gene in turn, we computed SNP-specific  
485 variance using annotation coefficient estimates from the best trait-relevant tissue inferred with  
486 consortium study summary statistics for the corresponding trait. We used the SNP-specific  
487 variance as SNP weights. As in simulations, for these weights, we subtracted from them the  
488 minimal weight across SNPs and added a small constant ( $10^{-15}$ ) to ensure that all weights are  
489 positive. We then multiplied the resulting SNP weights with the posterior probability (PP) of the  
490 best trait-relevant tissue and further added a value of 1-PP to all SNPs as the final SNP weights  
491 to perform SKAT [49-51] analysis. The SNP-weights for the 43 traits can be downloaded from  
492 <http://www.xzlab.org/>.  
493

## 494 Results

495

### 496 Simulations: Multiple Annotations versus Single Annotation

497

498 Our first set of simulations are used to illustrate the benefits of using multiple annotations to  
499 identify trait-relevant tissues. Details of simulations are provided in [Materials and Methods](#).  
500 Briefly, we obtained 27,640 SNPs from 10,000 randomly selected individuals in the GERA study  
501 [63,64] and simulated phenotypes. We considered two histone annotations (H3K4me1,  
502 H3K4me3) from ten tissue groups ([Table S1](#)), among which we randomly designated one as the  
503 trait-relevant tissue. We then simulated SNP effect sizes under a polygenic model based on the  
504 two annotations in the trait-relevant tissue. We added genetic effects with residual errors to form  
505 simulated phenotypes. We obtained summary statistics from the data and considered three  
506 different approaches to identify trait-relevant tissues:

507 (1) SMART. We analyzed two annotations jointly and computed a single multivariate Wald  
508 statistic for each tissue using our procedure. We then applied an EM algorithm and a mixture  
509 model on the multivariate Wald statistics to further classify tissues into two groups. We used the  
510 posterior probability of a tissue being trait-relevant to measure trait-tissue relevance.

511 (2) Uni. We analyzed one annotation at a time and computed two univariate Wald statistics for  
512 each tissue using our procedure. We then applied an EM algorithm to classify these Wald  
513 statistics into two groups. For each tissue and each annotation, we obtained the posterior  
514 probability of being a trait-relevant tissue to measure trait-tissue relevance.

515 (3) UniMax. We analyzed one annotation at a time. For each tissue, we computed two univariate  
516 Wald statistic using our procedure and selected among them the larger statistic as a measurement  
517 of trait-tissue relevance. We then applied an EM algorithm to classify these Wald statistics into  
518 two groups. For each tissue, we obtained the posterior probability of its being a trait-relevant  
519 tissue to measure trait-tissue relevance.

520

521 Above, we have included two versions of univariate tests: Uni and UniMax. While the Uni  
522 approach is widely applied in previous studies [16,27,28,48], the UniMax approach can be  
523 statistically more appropriate than Uni for summarizing tissue-level evidence. We considered a  
524 range of realistic annotation coefficient combinations (i.e.  $(\alpha_1, \alpha_2)$ ). For each combination, we  
525 performed 1,000 simulation replicates. For each method, we computed the power of various  
526 methods in detecting the trait-relevant tissue at a false discovery rate (FDR) of 0.1 ([Figure 1A](#)).  
527 In the majority of settings, analyzing multiple annotations jointly also improves power compared  
528 with analyzing one annotation at a time. For example, based on power at 10% FDR, SMART is  
529 ranked as the best method in 15 out of 25 simulation settings where both annotations have non-  
530 zero effects, while UniMax is the best in 10 settings ([Figure 1A](#)). While the performance of  
531 SMART is often followed by UniMax, the power improvement of SMART compared with  
532 UniMax can be large (median improvement = 9.2%). Certainly, in the special cases where one  
533 annotation coefficient is exactly zero or close to zero, then SMART is often outperformed by  
534 UniMax, presumably due to its smaller degree of freedom there. For example, among the 11  
535 settings where at least one annotation has zero effects (grey area, [Figure 1A](#)), SMART is ranked  
536 as the best method only 4 times, while UniMax is ranked as the best method 7 times. Finally, to  
537 further explore the characteristics of annotations that can influence the power of SMART in  
538 identifying trait-relevant tissues, we simulated annotations that have various genome-occupancy  
539 characteristics and that have various annotation effect sizes and signs ([Supplementary Text](#)). We

540 show that the power of SMART increases with increasing annotation coefficients, is not sensitive  
541 to the signs of annotations, and is relatively stable with respect to the genome-occupancy of the  
542 annotations as we have standardized the annotations to have mean zero and standard deviation  
543 one across the genome (Figure S3).

544  
545 We examine in detail a simulation setting where  $(\alpha_1, \alpha_2)$  are chosen to be close to the median  
546 estimates (0.1, 0.05) from the real data sets (i.e. gold shade in Figure 1A and Figure S1). Note  
547 that even though these parameters are chosen based on real data, we have much less SNPs or  
548 samples in the simulations than in real data and are thus underpowered in simulations. In any  
549 case, we first obtained annotation coefficient estimates  $(\hat{\alpha}_1, \hat{\alpha}_2)$  across simulation replicates in  
550 this setting. We found that the estimates are centered around the truth as one would expect  
551 (Figure 1B), suggesting accurate parameter estimation by our approach. Next, in addition to the  
552 six approaches listed above, we also included a UniMax\_LDSC approach into comparison. In the  
553 UniMax\_LDSC approach, we applied LDSC to analyze one trait at a time and used the  
554 maximum Wald statistics among the two to measure trait-tissue relevance. Different from the  
555 UniMax\_Wald, however, UniMax\_LDSC used a set of 75 baseline annotations to address  
556 correlation among annotations. As a result, UniMax\_LDSC performs similarly as UniMax in  
557 terms of power to detect trait relevant tissues at different FDR thresholds (Figure 1C), suggesting  
558 that using mixture modeling is competitive compared to using covariates to control for  
559 annotation correlation across tissues. Because both UniMax\_LDSC and UniMax use only one  
560 annotation, they are often less powerful compared to SMART that models two annotations  
561 together (Figure 1C).

## 562 563 **Simulations: Construct Powerful SNP Set Test**

564  
565 Our second set of simulations is intended to illustrate the benefits of our method in using inferred  
566 trait-relevant tissue to enable more powerful SNP set tests. Here, we ask the question of how to  
567 make use of the inferred trait-relevant tissues to enable more powerful future association studies.  
568 As explained in the Method Overview section, our model is closely related to the sequence  
569 kernel association test (SKAT) [49-51] for SNP set test. In particular, the SNP specific variance  
570 in our model can be naturally interpreted as the SNP specific weight in the SKAT [49-51]  
571 framework. Because of this close relationship between our model and SKAT [49-51], we propose  
572 to use the estimated SNP specific variance in the top trait-relevant tissue from our model as SNP  
573 weights to perform analysis in new association studies. Intuitively, if a SNP tends to have a large  
574 effect size, then weighting it high in the subsequent SNP set analysis can help achieve greater  
575 association mapping power. To explore the possibility of using the inferred SNP-specific  
576 variance estimate  $\hat{\sigma}_j^2$  as *a priori* weight to construct SNP set test in the SKAT framework [49-  
577 51], we obtained 10,000 SNPs from the same set of 10,000 individuals in the GERA study  
578 [63,64] and simulated phenotypes (Materials and Methods). To do so, we divided these SNPs  
579 evenly into 100 blocks and randomly selected 10 blocks to be causal blocks. In each casual  
580 block, we further selected 20 SNPs to be causal SNPs. We then simulated ten tissue-specific  
581 annotation sets with two annotations within each set and designated one set as the trait-relevant  
582 tissue. We simulated causal SNP effect sizes based on the two annotations from the trait-relevant  
583 tissue and added residual errors to form the simulated phenotypes. Afterwards, we divided  
584 individuals randomly into two sets: a training set of 7,000 individuals and a test set of 3,000  
585 individuals. We applied SMART\_EM and UniMax\_EM in the training set to identify trait-

586 relevant tissues and to estimate annotation coefficients. We then applied the following weighting  
587 options to perform SKAT [49-51] analysis in the test set:

- 588 (1) EqualWeight, where we weight all SNPs equally.
- 589 (2) TissueWeight\_Oracle, where we use the true coefficients from the correct trait-relevant tissue  
590 to construct SNP weights. This represents an up limit of power we can possibly achieve.
- 591 (3) TissueWeight\_SMART, where we fitted SMART\_EM in the training data and applied the  
592 coefficient estimates for the two annotations in the inferred trait-relevant tissue to construct SNP  
593 weights.
- 594 (4) TissueWeight\_UniMax, where we fitted UniMax\_EM in the training data and applied the  
595 coefficient estimate for the annotation with the larger Wald statistics in the inferred trait-relevant  
596 tissue to construct SNP weights.

597  
598 We first simulated 50,000 replicates under the null where there is no causal SNP so that both  $\alpha_0$   
599 and  $(\alpha_1, \alpha_2)$  are 0. We used the null simulations to examine the type I error control for various  
600 methods and we found that all these methods are well behaved (Figure 2A). Next, we simulated  
601 1,000 replicates under the alternative where we have non-zero  $\alpha_0$  and  $(\alpha_1, \alpha_2)$ . We divided SNPs  
602 into 100 blocks, among which 10 are causal. We compared different methods in terms of their  
603 power to identify the causal blocks. In the simulations, we generated two annotations whose  
604 values in the trait-relevant tissue are predictive of SNP causality. The annotation values for the  
605 two annotations are almost identical in a certain proportion of causal SNPs (chosen to be 0%,  
606 33%, or 100%) so that the two annotations can contain complementary information (in the case  
607 of 0%) or overlapping information (in the case of 100%). Intuitively, information overlapping in  
608 the two annotations would reduce the relative power gain of using multiple annotations versus  
609 using a single annotation in constructing SNP set tests. As one would expect, in all settings,  
610 constructing SNP weights using the true coefficients from the correct trait-relevant tissue (i.e.  
611 TissueWeight\_Oracle; red bars in Figure 2B and C) achieves the greatest power compared with  
612 the other methods. For example, compared with using equal weights, using the oracle weights  
613 improves power by 14.1% on average (median = 13.7%) across all settings. Importantly,  
614 constructing SNP weights using the estimated coefficients from the inferred trait-relevant tissue  
615 weight (i.e. TissueWeight\_SMART; green bars in Figure 2 B and C) can often achieve almost  
616 identical power as TissueWeight\_Oracle. Comparing between TissueWeight\_SMART and  
617 TissueWeight\_UniMax, when both annotations have non-zero coefficients, we found that using  
618 multiple annotations often leads to greater power gain than using a single annotation. However,  
619 as one would expect, when the two annotations contain overlapping information (e.g. in the case  
620 of 100%), then using one annotation yields similar power as using two annotations (green vs blue  
621 in Figure 2B). In the special case where only one annotation has a non-zero coefficient, then  
622 using multiple annotations also has similar power compared with using a single annotation, even  
623 when the two annotations contain complementary information (green vs blue in Figure 2C).

624  
625 Next, we explore how various simulation parameters influence the weighted SKAT power  
626 (Supplementary Text). Here, we also include TissueWeight\_UniMaxLDSC, where we applied  
627 LDSC with the UniMax procedure in the training data and used the coefficient estimate for the  
628 annotation with the larger Wald statistics in the inferred trait-relevant tissue to construct SNP  
629 weights. In this set of simulations, we varied the annotation coefficients and varied the number of  
630 causal blocks. The results are presented in Supplementary Figure S4. With simulations, we show  
631 that the power of SNP set test primarily depends on the phenotype variance explained (PVE) by



632 each causal block (i.e. per-block PVE) as well as annotation coefficients, and increases with  
633 increasing per-block PVE or annotation coefficients. In contrast, power is not influenced by the  
634 number of blocks when per-block PVE is fixed to be a constant, though it would decrease with  
635 increasing number of blocks when the total PVE is fixed (as per-block PVE is negatively  
636 correlated with number of blocks in this case). Importantly, TissueWeight\_SMART outperforms  
637 TissueWeight\_UniMax and TissueWeight\_UniMaxLDSC in most scenarios and outperforms  
638 EqualWeight in all scenarios.

## 639 **Real Data Applications**

640

### 641 **Data processing and analysis overview**

642

643 We applied our method to analyze 43 traits from 29 GWAS studies (**Table S2**). For these  
644 analyses, we obtained tissue-specific SNP annotations in 105 tissues from 10 tissue groups in the  
645 ENCODE [23] and Roadmap [22] projects and processed these annotations into three sets  
646 (details in **Materials and Methods**; **Table S1**): (1) four binary annotations (H3K27me3,  
647 H3K36me3, H3K4me1, and H3K4me3) in 105 tissues constructed based on histone mark  
648 occupancy; (2) four continuous annotations in 10 tissue groups (BloodImmune, Adipose,  
649 AdrenalPancreas, BoneConnective, Cardiovascular, CNS, Gastrointestinal, Liver, Muscle, and  
650 Other) based on averaging binary annotations across tissues within each tissue group; and (3)  
651 posterior probabilities of the 15 ChromHMM [62] states in the 10 tissue groups. For each trait in  
652 turn, we paired the three sets of annotations with GWAS summary statistics to identify trait-  
653 relevant tissues. Data processing and analysis details are described in the **Materials and Methods**.

654

### 655 **Trait tissue relevance determined by SMART is largely consistent with PubMed literature** 656 **and highlights the importance of modeling multiple annotations**

657

658 Besides applying our method to infer trait relevant tissues, we first rely on the knowledge gained  
659 from previous biomedical literature to measure trait-tissue relevance. To do so, we conducted a  
660 PubMed literature search and counted the number of publications existed for each trait-tissue  
661 pair. We reasoned that, if a tissue is indeed relevant to a given trait, then there would be a fair  
662 number of studies performed on the tissue for the given trait. Therefore, the number of  
663 publications carried out on a trait-tissue pair would be a good indicator on their relevance. Next,  
664 for each trait in turn, we normalized the count data by computing the proportion of previous  
665 publications performed on each of the nine tissue groups (i.e. the ten tissue groups minus the  
666 “Other” group), resulting in for each trait a vector of nine proportion values that sum to one  
667 (details in **Materials and Methods**). The number of total publications and proportion values for all  
668 traits are summarized in **Table S4**. The PubMed literature search results are generally consistent  
669 with what we would expect. For example, for schizophrenia (SCZ), 63.8% of the previous  
670 literatures are focused on CNS, with the rest of the literature scattered across other tissues. The  
671 proportion of literature carried out on each trait-tissue pair obtained in PubMed thus provides a  
672 reasonable *a priori* measure of trait-tissue relevance. We use these measurements to validate  
673 some of our analysis results using tissue specific annotations.

674

675 We then applied our method to jointly analyze multiple annotations for each of the three sets of  
676 tissue-specific annotations described above. We denote the analysis on annotation set (1) as **HB**  
677 (i.e. histone marks, binary), analysis on annotation set (2) as **HC** (i.e. histone marks, continuous),  
678 and analysis on annotation set (3) as **cHMM** (i.e. ChromHMM annotation). For **HC** and **cHMM**,  
679 we obtained the posterior probability values (PPs) from each of the 10 tissue groups for each  
680 trait. For **HB**, we first obtained PPs from each of the 105 tissues for each trait. For each trait in  
681 turn, we then averaged these PP values within each tissue group and used the averaged tissue  
682 group level PP values for the following analyses – this way we can perform comparisons at the  
683 tissue group level across different annotation sets. As a comparison, we also applied our method  
684 to each of the three annotation sets and performed univariate analysis that corresponds to the

685 UniMax procedure explained in the simulation section. These univariate analyses include  
686 **HBuMax**, which is a univariate analysis of the annotation set (1); **HCuMax**, which is a  
687 univariate analysis of the annotation set (2); **cHMMuMax**, which is a univariate analysis of the  
688 annotation set (3); and **HBuMaxLDSC**, which is a univariate analysis on the binary annotation  
689 set (1) using LDSC. In these univariate analyses, for each trait in turn, we first selected the  
690 annotation with the maximum Wald statistic in every tissue (or tissue group). We then computed  
691 the PPs of the selected mark in all tissues (or tissue groups). When necessary, we further  
692 averaged PPs (for **HBuMax**) or Wald statistics (for **HBuMaxLDSC**) within each tissue group to  
693 allow for comparison at the tissue group level. Overall, we obtained 10 tissue group level PP  
694 values or Wald statistics for every trait from each of the five different approaches. We list the top  
695 trait-relevant tissue groups with the largest PP value or Wald statistics identified by each of the  
696 above approaches in **Table S3**, with the corresponding tissue group PPs listed in the same table.  
697 The tissue group PPs from HC are also plotted in **Figure S5**.

698  
699 The results from those different approaches are largely consistent with the PubMed search  
700 results, though notable deviations exist. For example, PubMed search identified CNS to be the  
701 most relevant tissue to five neurological traits (ADD, BIP, SCZ, Autism and Alzheimer).  
702 Approaches using annotations also identified CNS as the most trait-relevant tissue for four of the  
703 five neurological traits (ADD, BIP, SCZ and Autism). However, for Alzheimer's disease, using  
704 tissue-specific annotations revealed BloodImmune tissue as a trait-relevant tissue, which is  
705 consistent with recent discoveries that inflammation and microglia are important for Alzheimer's  
706 disease etiology [73,74]. As another example, PubMed search identified liver to be the most  
707 relevant tissue for hematological traits (MCHC, MCH, MCV, MPV, PLT and RBC), presumably  
708 because of liver's important role in producing extrarenal erythropoietin [75]. In contrast, using  
709 tissue-specific annotation highlighted BloodImmune tissue as the most relevant tissue for  
710 hematological traits. The similarity and difference between SMART and PubMed search results  
711 highlight the importance of using different information to infer trait tissue relevance.

712  
713 We further quantify the similarity between various approaches and PubMed results. To do so, we  
714 compare the tissue group level PP values from the annotation integration approaches to the  
715 proportion of publications on each tissue group obtained from PubMed search. For each trait and  
716 each approach in turn, we computed the correlation between the PP vector for the nine tissue  
717 groups and the corresponding proportion values from PubMed search (**Figure 3C**). We reasoned  
718 that, if an approach makes good use of the annotation information, then the trait tissue relevance  
719 inferred by this approach would be consistent with the trait tissue relevance measured by  
720 PubMed search. Indeed, the Spearman's rank correlations between different integrative  
721 approaches and the PubMed search are reasonable, with an median (average) value of 0.474  
722 (0.420), 0.417 (0.379), 0.283 (0.242), 0.433 (0.397), 0.433 (0.376), 0.417 (0.360) and 0.417  
723 (0.344) for **HB**, **HBuMax**, **HBuMaxLDSC**, **HC**, **HCuMax**, **cHMM** and **cHMMuMax**,  
724 respectively. The correlation results also suggest that, for the same annotation set, using multiple  
725 annotations often yields better performance than using one annotation alone (i.e. **HB** vs  
726 **HBuMax** or **HBuMaxLDSC**, **HC** vs **HCuMax**, and **cHMM** vs **cHMMuMax**). Finally,  
727 comparing different annotation sets, we found that using 15 chromatin states (i.e. **cHMM** and  
728 **cHMMuMax**) often result in lower correlation than using the annotations based on histone  
729 occupancy, suggesting that post-processing histone occupancy data into chromatin states may  
730 lose important trait-tissue relevance information, dovetailing earlier findings [76].

731  
732  
733  
734  
735  
736  
737  
738  
739  
740  
741  
742  
743  
744  
745  
746  
747  
748  
749  
750  
751  
752  
753  
754  
755  
756  
757  
758  
759  
760  
761  
762  
763  
764  
765  
766  
767  
768  
769  
770  
771  
772  
773  
774  
775  
776

### **Tissue relevance analysis reveals important histone markers in predicting SNP effects and classifies 43 traits into five main clusters**

To characterize trait-tissue relevance at the tissue group level, we focused on the results from the *HC* approach in more details and examined the annotation coefficients for the four histone marks inferred from the most trait-relevant tissue. We show the estimates and their significance for individual traits in **Figure 3A** and then grouped coefficients across 43 traits in **Figure 3B**. Overall, among the four histone marks, two of them have positive coefficient estimates: the coefficient estimates for H3K4me1 are positive for 42 out of 43 traits, while the coefficient estimates for H3K4me3 are positive for 32 traits (**Figure 3B**). The positive coefficients for the two histone marks are consistent with their role in marking promoters and enhancers, which are enriched in or near association loci identified by multiple GWASs [11,45]. In contrast, the coefficient estimates of H3K27me3 and H3K36me3 are mostly estimated to be close to zero, with approximately random positive or negative signs (positive signs in 22 traits for H3K27me3, and in 25 traits for H3K36me3; **Figure 3A**). The near-zero estimates of H3K27me3 and H3K36me3 suggests that SNP effect sizes in polycomb repression regions and transcribed regions often do not differ much from the rest of the genome. In terms of the magnitude of the estimated coefficients, two of the four marks (H3K4me3 and H3K4me1) have large effect estimates, as well as high estimation variation, across all examined traits (**Figure 3B**). The large coefficient estimates for H3K4me3 and H3K4me1 suggest that both promoter regions and enhancer regions are highly predictive of SNP effect sizes and are often the most informative for inferring trait-tissue relevance.

The results with the *HC* approach are also consistent with what we see in the simulations. In particular, while our extended linear mixed model itself does not explicitly model the correlation among annotations across tissues, our mixture modeling and classification strategy implicitly accounts for annotation correlation across tissues and allows us to identify multiple trait-relevant tissues for a given trait when they are present. Indeed, examining the tissue group PPs from *HC* (**Figure S5**), we found that, among the 43 GWAS traits, more than half of them have one trait-relevant tissue with  $PP > 0.5$ , while 4 of them have two or more trait-relevant tissues with  $PPs > 0.5$ . For example, consistent with [16], the CNS tissue group was identified as the trait-relevant tissue for SCZ, BIP, YE and Ever smoked. Consistent with [16], the blood immune tissue group was identified as the trait-relevant tissues for CD, RA and UC. While consistent with [16,27], multiple tissue groups, including bone connective, muscle, cardiovascular and adipose, were identified as relevant for height.

To further characterize trait-tissue relevance at the tissue level, we examined the results from the *HB* approach in details. The annotation set (1) contains binary annotations for 105 tissues that belong to 10 tissue groups. We have only focused on examining group-level results from this set of annotations so far. Here, we focus instead on the PP values for the 105 tissues directly; thus we have a 105-vector of PP values for every trait. We relied on the PP values to rank tissues for every trait. The tissue rank list for each trait represents the tissue footprint of each trait: the trait-relevant tissues are ranked high in the list while the trait-irrelevant tissues are ranked low in the list. With the tissue rank list, we assess the similarity between GWAS traits in terms of their

777 tissue relevance by hierarchical clustering (Figure 4). We also computed pair-wise spearman  
778 correlation between traits based on the tissue rank list (Figure 5). Overall, applying the Bayesian  
779 information criterion (BIC) to the correlation plot using mclust [66] revealed five main trait  
780 clusters.

781  
782 The first and second trait clusters contain psychiatric disorders (i.e. SCZ, BIP, Autism, DS,  
783 Neuroticism and ADD) and neurological related traits (e.g. College, YE, Menarche, Child\_Obes,  
784 Child\_BMI, and EverSmoked). For these two clusters, the CNS tissue tends to be identified as  
785 the most trait-relevant, consist with previous studies [16,27]. Among these traits, BIP, Menarche,  
786 College, YE, BIPSCZ, SCZ, DS, Neuroticism are highly correlated with each other and all belong to  
787 the first trait cluster; while ADD, Autism, EverSmoked, Child\_BMI, Child\_Obes are all grouped  
788 into the second trait cluster. Among the psychiatric trait pairs in the first two clusters, SCZ and  
789 BIP pair has the highest correlation (spearman correlation = 0.561; versus median/mean  
790 correlation = 0.098/0.167; BIPSCZ are excluded), suggesting that SCZ and BIP are more similar  
791 to each other in terms of tissue relevance footprint compared with the other trait pairs. The third  
792 trait cluster contains traits that are often related to several tissue groups. Specifically, the  
793 anthropometric traits (i.e. BL, BW, FNBMD, LNBMD and Height) are related to the bone,  
794 connective and gastrointestinal tissues; while the metabolic traits (i.e. FG, T2D and HR) are  
795 related to the gastrointestinal, liver and adipose tissues. The fourth trait cluster mainly contains  
796 two categories of traits that include immune diseases (e.g. RA, Lupus, T1D, UC, PBC, CD and  
797 IBD) and hematological traits (e.g. MCHC, MCH, MCV, PLT, RBC and MPV). Both these two  
798 categories are related to blood immune tissues. However, the fourth cluster also contains  
799 Alzheimer's disease. The classification of Alzheimer's disease in the fourth cluster rather than in  
800 the first two clusters presumably reflects the close relationship of the disease to both  
801 BloodImmune and CNS [28,74]. Finally, the fifth trait cluster mainly contains metabolic traits  
802 (TC, TG, LDL, HDL and CAD) that are related to gastrointestinal and blood immune tissues.  
803 Note that traits from the last three clusters tend to have positive correlations among each other,  
804 while have negative correlations with traits from the first two clusters (Figure 5).

805

### 806 **Using Trait-relevant Tissue Results in More Powerful SNP Set Tests**

807

808 Finally, we explored the use of annotation coefficient estimates from the inferred trait-relevant  
809 tissues to construct SNP set tests in a separate data, the Wellcome trust cast control consortium  
810 (WTCCC) study. WTCCC contains the six common diseases that include T1D, T2D, CD, BIP,  
811 RA and CAD. We focused on a set of 5,588 genes and used 153,813 SNPs inside these genes to  
812 perform SNP set test using SKAT [49-51] (details in Materials and Methods). As in simulations,  
813 we considered three different SNP weights for SKAT test: (1) SNP weights constructed by the  
814 multivariate analysis approaches of SMART (i.e. *HC* and *HB*); (2) SNP weights constructed by  
815 the univariate maximal statistics approach (*HCuMax*, *HBuMaxLDSC* and *HBuMax*); and (3)  
816 equal SNP weights (*EqualWeight*). We apply different weights to each of the six diseases. We  
817 first display the quantile-quantile (QQ) plot of  $-\log_{10}$  p-values from SKAT in Figure 6 (for CD)  
818 and Figure S6 (for T1D, T2D, BIP, RA and CAD), which, consistent with simulations, suggests  
819 proper control of type I error. In the analysis, different approaches identified a different number  
820 of associated genes that pass the Bonferroni corrected genome-wide significance threshold  
821 ( $8.95 \times 10^{-6}$ ), and these numbers range from 12-15 (the union of them contains 17 genes). These  
822 genes are associated with either CD, RA, T1D or T2D, and have all been validated either in the  
823 original WTCCC study or in other GWASs of the same trait (Table 1). Consistent with

824 simulations, we found that SNP set tests using weights constructed from the trait-relevant tissue  
825 achieves higher power compared with using equal weights. For example, the **HC** approach or the  
826 **HB** approach identified 15 genes, 3 more than that identified using equal weights (Table 1). In  
827 particular, the **HC** approach identified *C1orf141* [77] and *BSN* [78] for CD as well as *FTO* [79]  
828 for T2D, and neither of these were identified by the equal weights approach. While the HB  
829 approach identified *BSN* [78] and *SLC22A5* [78] for CD as well as *FTO* [79] for T2D, and  
830 neither of these were identified by the equal weights approach. Finally, within each annotation  
831 set, using multiple annotations identified slightly more genes than using one annotation at a time  
832 (i.e. **HB** vs. **HBuMax** or **HBuMaxLDSC** and **HC** vs. **HCuMax**), again consistent with the  
833 simulation results.

## 834 Discussion

835  
836 We have presented a simple modification of the commonly used linear mixed model to integrate  
837 multiple SNP annotations with GWAS traits to facilitate the identification of trait-relevant  
838 tissues. We have described an accompanying GEE based parameter inference algorithm that  
839 makes use of summary statistics and naturally accounts for genetic correlation due to linkage  
840 disequilibrium. We have shown how the task of identifying trait-relevant tissues can be  
841 formulated into a classification problem and how mixture modeling can facilitate the inference of  
842 trait-relevant tissues in the presence of annotation correlation across tissues. We have also  
843 illustrated how the link between our extended linear mixed model and the commonly used SKAT  
844 can enable more powerful SNP set tests in new association studies. With both simulations and an  
845 in-depth analysis of 43 GWAS traits, we have illustrated the benefits of modeling multiple  
846 annotations jointly.

847  
848 Our approach complements several recently developed methods that aim to derive a single,  
849 interpretable synthetic annotation by combining information of multiple annotations in a tissue  
850 specific fashion [17,20,27,28]. Most of these methods rely on multiple annotation information  
851 and use clustering algorithms to cluster SNPs into two categories. The posterior probability of  
852 SNPs in the category with the smaller number of SNPs thus becomes a synthetic annotation and  
853 is often interpreted as the posterior probability of being a “causal” or “functional” SNP. While  
854 these synthetic annotations have the benefits of simplicity and potential interpretability, they  
855 often have the drawback of being derived without taking into account the GWAS trait of interest.  
856 Arguably, functions of genetic variants depend on traits and clustering SNPs without considering  
857 the trait of interest may be suboptimal. Our approach complements these previous methods in  
858 that we effectively derive a synthetic annotation by taking GWAS traits into account. In  
859 particular, our method can be viewed as a supervised approach to combine multiple annotations  
860 into a single annotation, where the single annotation is represented as a weighted summation of  
861 the multiple annotations, with the weights being the estimated annotation coefficients inferred  
862 directly using the GWAS trait. Therefore, the approach we develop effectively takes the trait of  
863 interest into account. Certainly, both our approach and these previous approaches make a key  
864 modeling assumption that multiple annotations in the trait-relevant tissue are more relevant to  
865 SNP effect sizes or causality as compared with annotations in trait-irrelevant tissues. While it is a  
866 reasonable assumption for histone occupancy based annotations we examine here, this  
867 assumption may not hold well for certain annotations and for certain complex traits. For  
868 example, it is possible the classification of trait-relevant tissue depends on what annotation one  
869 examines: the SNP effect sizes can be predicted well by using one annotation in one tissue, or by  
870 using another annotation in a different tissue. To briefly explore the utility of our method in the  
871 case of multiple trait-relevant tissues, we performed a simulation study that is similar to the  
872 polygenic scenario presented in the results section but with two trait-relevant tissues: we used  
873 one annotation from one tissue and another annotation from another tissue to simulate SNP effect  
874 sizes. In this setting, as one might expect, the difference between the multivariate approach and  
875 the univariate approach is small (Figure S7). Therefore, developing method for the case of  
876 multiple trait-relevant tissues is an interesting future direction.

877  
878 We rely on a polygenic model to evaluate the contribution of annotations to SNP effect sizes and  
879 infer trait-relevant tissues. Our polygenic model assumes that all SNP effect sizes are non-zero

880 and follow a normal distribution with SNP-specific variance that is a function of multiple  
881 annotations. Therefore, our approach is different from several previous approaches that rely on a  
882 sparse model to evaluate the contribution of annotations to SNP causality [11,12,27,28,40,53] .  
883 While sparse models can be used to directly link annotation coefficients to the causality of SNPs,  
884 they often encounter severe computational burdens due to linkage disequilibrium among SNPs.  
885 For example, the recent sparse model bfGWAS [40] has to divide genome into thousands of  
886 approximately independent blocks and perform analysis within each block separately; and even  
887 with such a simplified algorithm it can take a sparse model days to analyze a GWAS data with  
888 tens of thousands of individuals and millions of SNPs. In contrast, a key advantage of our  
889 polygenic model and its GEE based inference algorithm is their ability to properly account for  
890 linkage disequilibrium while being computationally trackable. Indeed, it only take about 20  
891 minutes to analyze each of trait-tissue pair in our real data application with hundreds of  
892 thousands of individuals and millions of SNPs. Certainly, the polygenic modeling assumption  
893 that all SNPs have non-zero effects may not be realistic for certain traits and developing both  
894 realistic and computationally efficient methods is an important future direction.

895  
896 We have focused primarily on using tissue-specific annotations based on histone occupancy from  
897 the ENCODE and ROADMAP projects. Other tissue-specific annotations are nowadays readily  
898 available. For example, the GTEx project measures expression quantitative trait loci (eQTL)  
899 information in 53 tissues, many of which overlap with that in ROADMAP. Our method can  
900 easily incorporate multiple annotations from different data sources and include both eQTL  
901 annotations from GTEx and histone annotations from ROADMAP, though caution needs to be  
902 made to account for accuracy difference in these eQTL annotations from different tissues due to  
903 sample size variation. In any case, jointly analyzing multiple sources of annotations will likely  
904 improve power further in identifying trait-relevant tissues in the future.

905  
906 In the real data application, we have attempted to infer fine-scale trait-tissue relevance by using  
907 105 tissues instead of the 10 tissue groups using the **HB** approach. The inferred top-ranking  
908 tissue types from the **HB** approach for each of the 43 GWAS traits are listed in **Supplementary**  
909 **Table S5**. As expected, most of these top-ranking tissues belong to the top-ranking tissue group  
910 (median = 70.5% across traits), suggesting relatively stable inference results whether tissues or  
911 tissue groups were used in the analysis. For example, all of the top-ranking tissues (with PP >  
912 0.5) for ever smoked and YE belong to the CNS tissue group, and 28 of the 39 top-ranking  
913 tissues for CD belong to the blood immune tissue group. We have attempted to further quantify  
914 the tissue-level relevance results by comparing them to the corresponding PubMed search  
915 results, as we have done in the main text for the tissue group analysis. However, we found that  
916 PubMed search results are unable to distinguish fine-scale tissue types for most traits. Therefore,  
917 we had to rely on prior biology knowledge obtained in various other studies to validate our tissue  
918 relevance analysis. In many cases, the top-ranking tissue fits our prior expectation. However, we  
919 also acknowledge that identifying relevant tissues from >100 tissue types is indeed a challenging  
920 task. Specifically, for 34 out of 43 traits, the PPs for more than half of the tissues within the  
921 corresponding top-ranking tissue group are greater than 0.5, suggesting that it is often difficult to  
922 identify a single trait-relevant tissue within the tissue group. Alternative approaches to explore  
923 fine-scale trait-tissue relevance have been suggested before. For example, a two-step analysis  
924 procedure was proposed to first identify trait-relevant tissue group and then identify trait-relevant  
925 tissue within the tissue group [80]. In addition, using synthetic annotations generated from



926 Genoskyline [28] or FUN-LDA [81] could be particularly useful for identifying fine scale trait-  
927 relevant tissues. Our method can be easily adapted to incorporate a two-step analysis procedure  
928 and/or accommodate synthetic annotations, and has the potential to yield better trait-tissue  
929 relevance resolution in the future.

930

931 Finally, while we have mainly focused on inferring trait-relevant tissues, we have also explored  
932 the feasibility of using inferred trait-relevant tissues and the estimated annotation coefficients to  
933 enable more powerful SNP set test in future GWASs. In practice, multiple annotation sets can be  
934 used to construct SNP set tests (e.g. HC and HB annotations sets as used in our real data  
935 application). It is often difficult *a priori* to determine which annotation set would yield the best  
936 results. Therefore, we recommend analyzing all of these annotation sets separately and choose  
937 the one that yields the highest power, as we have done in the real data application. In addition,  
938 sometimes the trait of interest may have multiple relevant tissues. In this case, we can apply the  
939 PPs from the identified trait-relevant tissues (with  $PP > 0.5$ ) to weight the corresponding estimated  
940 annotation coefficients from these tissues to form a set of weighted annotation coefficients, in  
941 line with the Bayesian model averaging idea. Finally, while incorporating annotation information  
942 does increase SNP set test power, we also found that such power improvement in realistic  
943 settings depends on traits and can be variable. The variability in power improvement of our  
944 method is consistent with many previous studies that have shown similar variability in power  
945 improvement by integrating SNP annotations into single SNP association tests [11,40]. However,  
946 increasing sample size and the development of better SNP annotations will likely facilitate the  
947 adaption of various annotation integration methods in the near future.

## Reference

- 948  
949  
950 1. Welter D, MacArthur J, Morales J, Burdett T, Hall P, et al. (2014) The NHGRI GWAS Catalog, a curated resource  
951 of SNP-trait associations. *Nucleic acids research* 42: D1001-D1006.  
952 2. Greene CS, Krishnan A, Wong AK, Ricciotti E, Zelaya RA, et al. (2015) Understanding multicellular function and  
953 disease with human tissue-specific networks. *Nature genetics* 47: 569-576.  
954 3. Lage K, Hansen NT, Karlberg EO, Eklund AC, Roque FS, et al. (2008) A large-scale analysis of tissue-specific  
955 pathology and gene expression of human disease genes and complexes. *Proceedings of the National  
956 Academy of Sciences* 105: 20870-20875.  
957 4. Kumar V, Sanseau P, Simola DF, Hurle MR, Agarwal P (2016) Systematic Analysis of Drug Targets Confirms  
958 Expression in Disease-Relevant Tissues. *Scientific Reports* 6.  
959 5. Xiao X, Chang H, Li M (2017) Molecular mechanisms underlying noncoding risk variations in psychiatric genetic  
960 studies. *Molecular Psychiatry*.  
961 6. Uhlhaas PJ, Singer W (2010) Abnormal neural oscillations and synchrony in schizophrenia. *Nature reviews  
962 neuroscience* 11: 100-113.  
963 7. Lang UE, Puls I, Müller DJ, Strutz-Seebohm N, Gallinat J (2007) Molecular mechanisms of schizophrenia.  
964 *Cellular Physiology and Biochemistry* 20: 687-702.  
965 8. Fornito A, Zalesky A, Breakspear M (2015) The connectomics of brain disorders. *Nature Reviews Neuroscience*  
966 16: 159-172.  
967 9. Belmaker R (2004) Bipolar disorder. *New England Journal of Medicine* 351: 476-486.  
968 10. Trynka G, Sandor C, Han B, Xu H, Stranger BE, et al. (2013) Chromatin marks identify critical cell types for  
969 fine mapping complex trait variants. *Nature genetics* 45: 124-130.  
970 11. Pickrell JK (2014) Joint analysis of functional genomic data and genome-wide association studies of 18 human  
971 traits. *The American Journal of Human Genetics* 94: 559-573.  
972 12. Kichaev G, Yang W-Y, Lindstrom S, Hormozdiari F, Eskin E, et al. (2014) Integrating functional data to  
973 prioritize causal variants in statistical fine-mapping studies. *PLoS Genet* 10: e1004722.  
974 13. Trynka G, Westra H-J, Slowikowski K, Hu X, Xu H, et al. (2015) Disentangling the effects of colocalizing  
975 genomic annotations to functionally prioritize non-coding variants within complex-trait loci. *The American  
976 Journal of Human Genetics* 97: 139-152.  
977 14. Farh KK-H, Marson A, Zhu J, Kleinewietfeld M, Housley WJ, et al. (2015) Genetic and epigenetic fine mapping  
978 of causal autoimmune disease variants. *Nature* 518: 337-343.  
979 15. Li Y, Kellis M (2016) Joint Bayesian inference of risk variants and tissue-specific epigenomic enrichments  
980 across multiple complex human diseases. *Nucleic acids research* 44: e144-e144.  
981 16. Finucane HK, Bulik-Sullivan B, Gusev A, Trynka G, Reshef Y, et al. (2015) Partitioning heritability by  
982 functional annotation using genome-wide association summary statistics. *Nature genetics* 47: 1228-1235.  
983 17. Ionita-Laza I, McCallum K, Xu B, Buxbaum JD (2016) A spectral approach integrating functional genomic  
984 annotations for coding and noncoding variants. *Nature genetics* 48: 214-220.  
985 18. Kircher M, Witten DM, Jain P, O’Roak BJ, Cooper GM, et al. (2014) A general framework for estimating the  
986 relative pathogenicity of human genetic variants. *Nature genetics* 46: 310.  
987 19. Lu Q, Hu Y, Sun J, Cheng Y, Cheung K-H, et al. (2015) A statistical framework to predict functional non-coding  
988 regions in the human genome through integrated analysis of annotation data. *Scientific reports* 5: 10576.  
989 20. Chen L, Jin P, Qin ZS (2016) DIVAN: accurate identification of non-coding disease-specific risk variants using  
990 multi-omics profiles. *Genome Biology* 17: 252.  
991 21. Fu Y, Liu Z, Lou S, Bedford J, Mu XJ, et al. (2014) FunSeq2: a framework for prioritizing noncoding regulatory  
992 variants in cancer. *Genome biology* 15: 480.  
993 22. Kundaje A, Meuleman W, Ernst J, Bilenky M, Yen A, et al. (2015) Integrative analysis of 111 reference human  
994 epigenomes. *Nature* 518: 317-330.  
995 23. The ENCODE Project Consortium (2012) An integrated encyclopedia of DNA elements in the human genome.  
996 *Nature* 489: 57-74.  
997 24. Lonsdale J, Thomas J, Salvatore M, Phillips R, Lo E, et al. (2013) The genotype-tissue expression (GTEx)  
998 project. *Nature genetics* 45: 580-585.  
999 25. Ernst J, Kellis M (2010) Discovery and characterization of chromatin states for systematic annotation of the  
1000 human genome. *Nature biotechnology* 28: 817-825.  
1001 26. Ernst J, Kheradpour P, Mikkelsen TS, Shores N, Ward LD, et al. (2011) Mapping and analysis of chromatin  
1002 state dynamics in nine human cell types. *Nature* 473: 43-49.

- 1003 27. Lu Q, Powles RL, Wang Q, He BJ, Zhao H (2016) Integrative tissue-specific functional annotations in the  
1004 human genome provide novel insights on many complex traits and improve signal prioritization in genome  
1005 wide association studies. *PLoS Genet* 12: e1005947.
- 1006 28. Lu Q, Powles RL, Abdallah S, Ou D, Wang Q, et al. (2017) Systematic tissue-specific functional annotation of  
1007 the human genome highlights immune-related DNA elements for late-onset Alzheimer's disease. *PLoS*  
1008 *Genet* 13: e1006933.
- 1009 29. Kellis M, Wold B, Snyder MP, Bernstein BE, Kundaje A, et al. (2014) Defining functional DNA elements in the  
1010 human genome. *Proceedings of the National Academy of Sciences* 111: 6131-6138.
- 1011 30. Chung D, Yang C, Li C, Gelernter J, Zhao H (2014) GPA: a statistical approach to prioritizing GWAS results by  
1012 integrating pleiotropy and annotation. *PLoS Genet* 10: e1004787.
- 1013 31. Gazal S, Finucane HK, Furlotte NA, Loh P-R, Palamara PF, et al. (2017) Linkage disequilibrium-dependent  
1014 architecture of human complex traits shows action of negative selection. *Nature Genetics* 49: 1421-1427.
- 1015 32. He Z, Xu B, Lee S, Ionita-Laza I (2017) Unified Sequence-Based Association Tests Allowing for Multiple  
1016 Functional Annotations and Meta-analysis of Noncoding Variation in Metachip Data. *The American*  
1017 *Journal of Human Genetics* 101: 340-352.
- 1018 33. Tennessen JA, Bigham AW, O'Connor TD, Fu W, Kenny EE, et al. (2012) Evolution and functional impact of  
1019 rare coding variation from deep sequencing of human exomes. *science* 337: 64-69.
- 1020 34. Bannister AJ, Kouzarides T (2011) Regulation of chromatin by histone modifications. *Cell research* 21: 381-395.
- 1021 35. Liu X, Finucane HK, Gusev A, Bhatia G, Gazal S, et al. (2017) Functional Architectures of Local and Distal  
1022 Regulation of Gene Expression in Multiple Human Tissues. *Am J Hum Genet* 100: 605-616.
- 1023 36. Li YI, van de Geijn B, Raj A, Knowles DA, Petti AA, et al. (2016) RNA splicing is a primary link between  
1024 genetic variation and disease. *Science* 352: 600-604.
- 1025 37. Zhou X, Stephens M (2012) Genome-wide efficient mixed-model analysis for association studies. *Nat Genet* 44:  
1026 821-824.
- 1027 38. Zhou X, Carbonetto P, Stephens M (2013) Polygenic modeling with Bayesian sparse linear mixed models. *PLoS*  
1028 *Genet* 9: e1003264.
- 1029 39. Zhu X, Stephens M (2016) Bayesian large-scale multiple regression with summary statistics from genome-wide  
1030 association studies. *bioRxiv*.
- 1031 40. Yang J, Fritsche LG, Zhou X, Abecasis G, International Age-Related Macular Degeneration Genomics C (2017)  
1032 A Scalable Bayesian Method for Integrating Functional Information in Genome-wide Association Studies.  
1033 *Am J Hum Genet*.
- 1034 41. Wu TT, Chen YF, Hastie T, Sobel E, Lange K (2009) Genome-wide association analysis by lasso penalized  
1035 logistic regression. *Bioinformatics* 25: 714-721.
- 1036 42. Yang J, Benyamin B, McEvoy BP, Gordon S, Henders AK, et al. (2010) Common SNPs explain a large  
1037 proportion of the heritability for human height. *Nature genetics* 42: 565-569.
- 1038 43. Speed D, Hemani G, Johnson MR, Balding DJ (2012) Improved heritability estimation from genome-wide  
1039 SNPs. *The American Journal of Human Genetics* 91: 1011-1021.
- 1040 44. Kostem E, Eskin E (2013) Improving the accuracy and efficiency of partitioning heritability into the  
1041 contributions of genomic regions. *The American Journal of Human Genetics* 92: 558-564.
- 1042 45. Gusev A, Lee SH, Trynka G, Finucane H, Vilhjálmsson BJ, et al. (2014) Partitioning heritability of regulatory  
1043 and cell-type-specific variants across 11 common diseases. *The American Journal of Human Genetics* 95:  
1044 535-552.
- 1045 46. Liang K-Y, Zeger SL (1986) Longitudinal data analysis using generalized linear models. *Biometrika*: 13-22.
- 1046 47. Hecker J, Prokopenko D, Lange C, Fier HL (2017) PolyGEE: a generalized estimating equation approach to the  
1047 efficient and robust estimation of polygenic effects in large-scale association studies. *Biostatistics*.
- 1048 48. Zhou X (2017) A unified framework for variance component estimation with summary statistics in genome-wide  
1049 association studies. *Annals of Applied Statistics* ( in press).
- 1050 49. Lee S, Teslovich TM, Boehnke M, Lin X (2013) General framework for meta-analysis of rare variants in  
1051 sequencing association studies. *Am J Hum Genet* 93: 42-53.
- 1052 50. Ionita-Laza I, Lee S, Makarov V, Buxbaum JD, Lin X (2013) Sequence kernel association tests for the combined  
1053 effect of rare and common variants. *Am J Hum Genet* 92: 841-853.
- 1054 51. Wu MC, Kraft P, Epstein MP, Taylor DM, Chanock SJ, et al. (2010) Powerful SNP-set analysis for case-control  
1055 genome-wide association studies. *Am J Hum Genet* 86: 929-942.
- 1056 52. Yang J, Lee SH, Goddard ME, Visscher PM (2011) GCTA: a tool for genome-wide complex trait analysis. *Am J*  
1057 *Hum Genet* 88: 76-82.
- 1058 53. Hormozdiani F, Kostem E, Kang EY, Pasaniuc B, Eskin E (2014) Identifying causal variants at loci with multiple

- 1059 signals of association. *Genetics* 198: 497-508.
- 1060 54. Chen WM, Broman KW, Liang KY (2004) Quantitative trait linkage analysis by generalized estimating  
1061 equations: unification of variance components and Haseman-Elston regression. *Genet Epidemiol* 26: 265-  
1062 272.
- 1063 55. Consortium GP (2012) An integrated map of genetic variation from 1,092 human genomes. *Nature* 491: 56-65.
- 1064 56. Wall JD, Pritchard JK (2003) Haplotype blocks and linkage disequilibrium in the human genome. *Nature*  
1065 *Reviews Genetics* 4: 587-597.
- 1066 57. Berisa T, Pickrell JK (2016) Approximately independent linkage disequilibrium blocks in human populations.  
1067 *Bioinformatics* 32: 283-285.
- 1068 58. Gabriel SB, Schaffner SF, Nguyen H, Moore JM, Roy J, et al. (2002) The structure of haplotype blocks in the  
1069 human genome. *Science* 296: 2225-2229.
- 1070 59. Stephens M (2017) False discovery rates: a new deal. *Biostatistics* 18: 275-294.
- 1071 60. Snyder-Mackler N, Majoros WH (2016) Efficient Genome-Wide Sequencing and Low-Coverage Pedigree  
1072 Analysis from Noninvasively Collected Samples. 203: 699-714.
- 1073 61. Hu Y, Lu Q, Powles R, Yao X, Yang C, et al. (2017) Leveraging functional annotations in genetic risk prediction  
1074 for human complex diseases. *PLOS Computational Biology* 13: e1005589.
- 1075 62. Ernst J, Kellis M (2012) ChromHMM: automating chromatin-state discovery and characterization. *Nat Meth* 9:  
1076 215-216.
- 1077 63. Banda Y, Kvale MN, Hoffmann TJ, Hesselson SE, Ranatunga D, et al. (2015) Characterizing race/ethnicity and  
1078 genetic ancestry for 100,000 subjects in the Genetic Epidemiology Research on Adult Health and Aging  
1079 (GERA) cohort. *Genetics* 200: 1285-1295.
- 1080 64. Kvale MN, Hesselson S, Hoffmann TJ, Cao Y, Chan D, et al. (2015) Genotyping informatics and quality control  
1081 for 100,000 subjects in the Genetic Epidemiology Research on Adult Health and Aging (GERA) cohort.  
1082 *Genetics* 200: 1051-1060.
- 1083 65. Pickrell JK, Berisa T, Liu JZ, Ségurel L, Tung JY, et al. (2016) Detection and interpretation of shared genetic  
1084 influences on 42 human traits. *Nature genetics*.
- 1085 66. Fraley C, Raftery AE (2007) Model-based methods of classification: using the mclust software in chemometrics.  
1086 *Journal of Statistical Software* 18: 1-13.
- 1087 67. Burton PR, Clayton DG, Cardon LR, Craddock N, Deloukas P, et al. (2007) Genome-wide association study of  
1088 14,000 cases of seven common diseases and 3,000 shared controls. *Nature* 447: 661-678.
- 1089 68. Servin B, Stephens M (2007) Imputation-based analysis of association studies: candidate regions and  
1090 quantitative traits. *PLoS Genet* 3: e114.
- 1091 69. Delaneau O, Marchini J, Zagury JF (2011) A linear complexity phasing method for thousands of genomes. *Nat*  
1092 *Methods* 9: 179-181.
- 1093 70. Delaneau O, Zagury J-F, Marchini J (2013) Improved whole-chromosome phasing for disease and population  
1094 genetic studies. *Nat Meth* 10: 5-6.
- 1095 71. Howie BN, Donnelly P, Marchini J (2009) A flexible and accurate genotype imputation method for the next  
1096 generation of genome-wide association studies. *PLoS Genet* 5: e1000529.
- 1097 72. Harrow J, Frankish A, Gonzalez JM, Tapanari E, Diekhans M, et al. (2012) GENCODE: The reference human  
1098 genome annotation for The ENCODE Project. *Genome Research* 22: 1760-1774.
- 1099 73. Mandrekar S, Landreth GE (2010) Microglia and Inflammation in Alzheimer's Disease. *CNS & neurological*  
1100 *disorders drug targets* 9: 156-167.
- 1101 74. Gjoneska E, Pfenning AR, Mathys H, Quon G, Kundaje A, et al. (2015) Conserved epigenomic signals in mice  
1102 and humans reveal immune basis of Alzheimer's disease. *Nature* 518: 365-369.
- 1103 75. Fried W (1972) The liver as a source of extrarenal erythropoietin production. *Blood* 40: 671-677.
- 1104 76. Zhou X, Cain CE, Myrthil M, Lewellen N, Michelini K, et al. (2014) Epigenetic modifications are associated  
1105 with inter-species gene expression variation in primates. *Genome biology* 15: 547.
- 1106 77. Ballard D, Abraham C, Cho J, Zhao H (2010) Pathway analysis comparison using Crohn's disease genome wide  
1107 association studies. *BMC Medical Genomics* 3: 25.
- 1108 78. Marquez A, Cenit MC, Nunez C, Mendoza JL, Taxonera C, et al. (2009) Effect of BSN-MST1 locus on  
1109 inflammatory bowel disease and multiple sclerosis susceptibility. *Genes Immun* 10: 631-635.
- 1110 79. Flannick J, Florez JC (2016) Type 2 diabetes: genetic data sharing to advance complex disease research. *Nat Rev*  
1111 *Genet* 17: 535-549.
- 1112 80. Finucane H, Reshef Y, Anttila V, Slowikowski K, Gusev A, et al. (2017) Heritability enrichment of specifically  
1113 expressed genes identifies disease-relevant tissues and cell types. *bioRxiv*.
- 1114 81. Backenroth D, He Z, Kiryluk K, Boeva V, Pethukova L, et al. (2017) FUN-LDA: A latent Dirichlet allocation

- 1115 model for predicting tissue-specific functional effects of noncoding variation. bioRxiv.  
1116 82. Liu JZ, Anderson CA (2014) Genetic studies of Crohn's disease: Past, present and future. *Best Practice &*  
1117 *Research Clinical Gastroenterology* 28: 373-386.  
1118 83. Pranculiene G, Steponaitiene R, Skieceviciene J, Kucinskiene R, Kiudelis G, et al. (2016) Associations between  
1119 NOD2, IRGM and ORMDL3 polymorphisms and pediatric-onset inflammatory bowel disease in the  
1120 Lithuanian population. *Medicina (Kaunas)* 52: 325-330.  
1121 84. Cleynen I, Juni P, Bekkering GE, Nuesch E, Mendes CT, et al. (2011) Genetic evidence supporting the  
1122 association of protease and protease inhibitor genes with inflammatory bowel disease: a systematic review.  
1123 *PLoS One* 6: e24106.  
1124 85. Franke A, McGovern DP, Barrett JC, Wang K, Radford-Smith GL, et al. (2010) Genome-wide meta-analysis  
1125 increases to 71 the number of confirmed Crohn's disease susceptibility loci. *Nat Genet* 42: 1118-1125.  
1126 86. Sharp RC, Abdulrahim M, Naser ES, Naser SA (2015) Genetic Variations of PTPN2 and PTPN22: Role in the  
1127 Pathogenesis of Type 1 Diabetes and Crohn's Disease. *Front Cell Infect Microbiol* 5: 95.  
1128 87. Wiede F, Sacirbegovic F, Leong YA, Yu D, Tiganis T (2017) PTPN2-deficiency exacerbates T follicular helper  
1129 cell and B cell responses and promotes the development of autoimmunity. *J Autoimmun* 76: 85-100.  
1130 88. Steer S, Abkevich V, Gutin A, Cordell HJ, Gendall KL, et al. (2007) Genomic DNA pooling for whole-genome  
1131 association scans in complex disease: empirical demonstration of efficacy in rheumatoid arthritis. *Genes*  
1132 *Immun* 8: 57-68.  
1133 89. Prahalad S, Hansen S, Whiting A, Guthery SL, Clifford B, et al. (2009) Variants in TNFAIP3, STAT4, and  
1134 C12orf30 loci associated with multiple autoimmune diseases are also associated with juvenile idiopathic  
1135 arthritis. *Arthritis Rheum* 60: 2124-2130.  
1136 90. Tomer Y, Dolan LM, Kahaly G, Divers J, D'Agostino RB, et al. (2015) GENOME WIDE IDENTIFICATION  
1137 OF NEW GENES AND PATHWAYS IN PATIENTS WITH BOTH AUTOIMMUNE THYROIDITIS AND  
1138 TYPE 1 DIABETES. *Journal of autoimmunity* 60: 32-39.  
1139 91. Douroudis K, Kisand K, Nemvalts V, Rajasalu T, Uibo R (2010) Allelic variants in the PHTF1-PTPN22,  
1140 C12orf30 and CD226 regions as candidate susceptibility factors for the type 1 diabetes in the Estonian  
1141 population. *BMC Med Genet* 11: 11.  
1142 92. Hakonarson H, Qu H-Q, Bradfield JP, Marchand L, Kim CE, et al. (2008) A novel susceptibility locus for type 1  
1143 diabetes on Chr12q13 identified by a genome-wide association study. *Diabetes* 57: 1143-1146.  
1144 93. Kong X, Zhang X, Xing X, Zhang B, Hong J, et al. (2015) The Association of Type 2 Diabetes Loci Identified in  
1145 Genome-Wide Association Studies with Metabolic Syndrome and Its Components in a Chinese Population  
1146 with Type 2 Diabetes. *PLoS One* 10: e0143607.  
1147  
1148

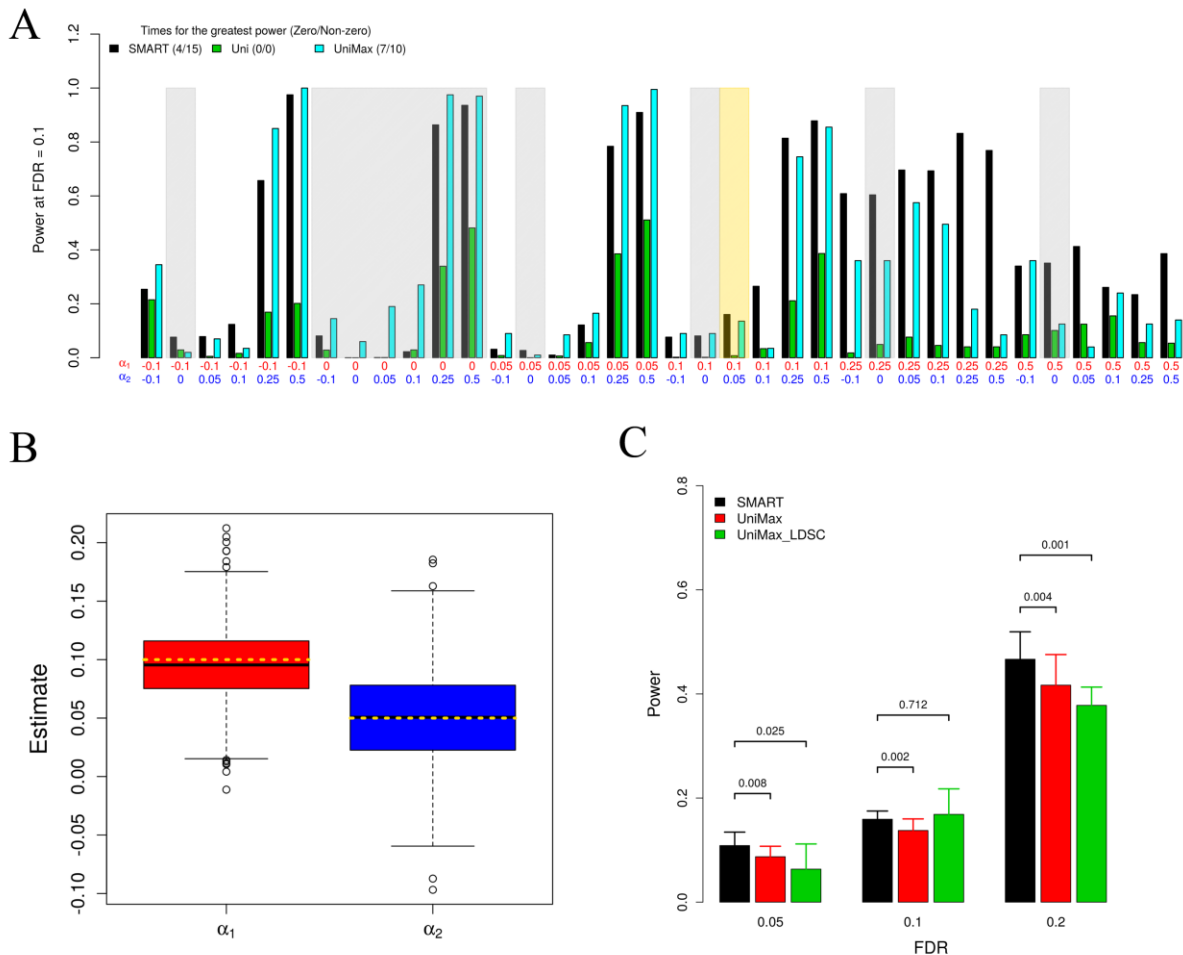

1149  
 1150 **Figure 1** Simulation results for comparing using multiple annotations versus a single annotation. (A) Power to  
 1151 detect trait-relevant tissues by different approaches in various settings at a fixed FDR of 0.1. x-axis shows the values  
 1152 of the two annotation coefficients used in the simulations. Settings where at least one annotation coefficient is zero  
 1153 are shaded in grey. The setting where the annotation coefficients equal to the median estimates from real data (i.e.  
 1154  $\alpha = (0.1, 0.05)$ ) is shaded in gold. The first number for each method in the figure legend represents the number of  
 1155 times each method is ranked as the best in 25 simulation settings where none of the annotations have zero  
 1156 coefficients; while the second number represents the number of times each method is ranked as the best in 11  
 1157 simulation settings where at least one annotation has a zero coefficient. (B) Annotation coefficient estimates by  
 1158 SMART are centered around the truth (horizontal dotted gold lines). (C) Mean power (y-axis) to detect trait-relevant  
 1159 tissues by different approaches at different FDR values (x-axis). Error bar shows the standard deviation computed  
 1160 across 10 simulation groups, each of which contains 1,000 simulation replicates (i.e. a total of 10,000 simulations).  
 1161  $p$ -values from the paired t-test are used to compare methods at different FDR cutoffs. Note that the error bar is large  
 1162 due to the small number of simulation replicates within each simulation group. For (B) and (C), simulations were  
 1163 done at  $\alpha = (0.1, 0.05)$ . FDR, false discovery rate.  
 1164

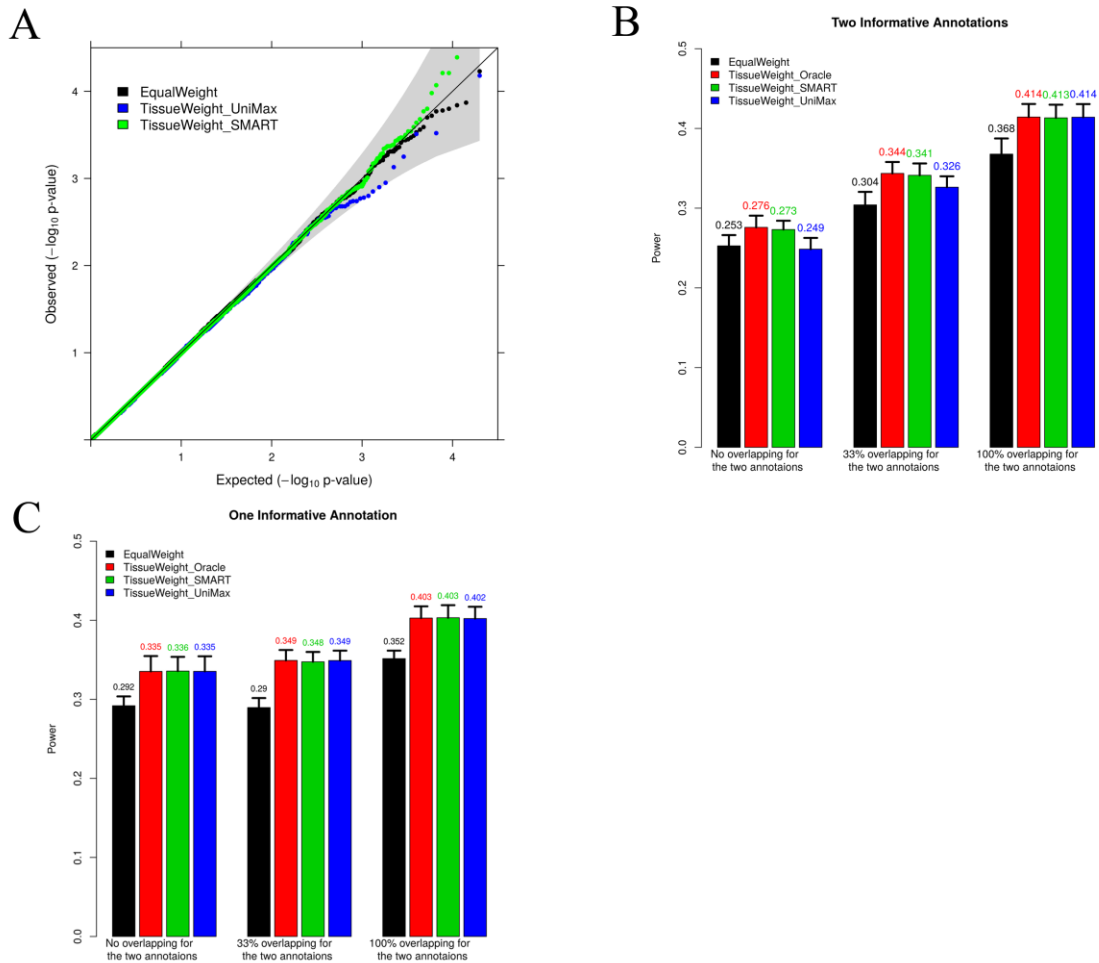

1165  
 1166 **Figure 2** Simulation results for using different weights to construct SNP set tests. (A) QQ plot of  $-\log_{10}$  p values  
 1167 from SNP set tests using different SNP weights under the null simulations. Tests using different weights all control  
 1168 type I error well. (B) Power to detect causal blocks by SNP set tests using different SNP weights in the simulation  
 1169 setting where  $\alpha = (0.4, 0.4)$ . (C) Power to detect causal blocks by SNP set tests using different SNP weights in the  
 1170 simulation setting where  $\alpha = (0.4, 0)$ . For both (B) and (C), Power are evaluated at a genome-wide significance  
 1171 threshold of  $1 \times 10^{-4}$ . Standard errors are computed across 1,000 simulation replicates. The x-axis shows the  
 1172 proportion of causal SNPs that have identical values for the two annotations, which measures correlation between  
 1173 the two annotations.  
 1174

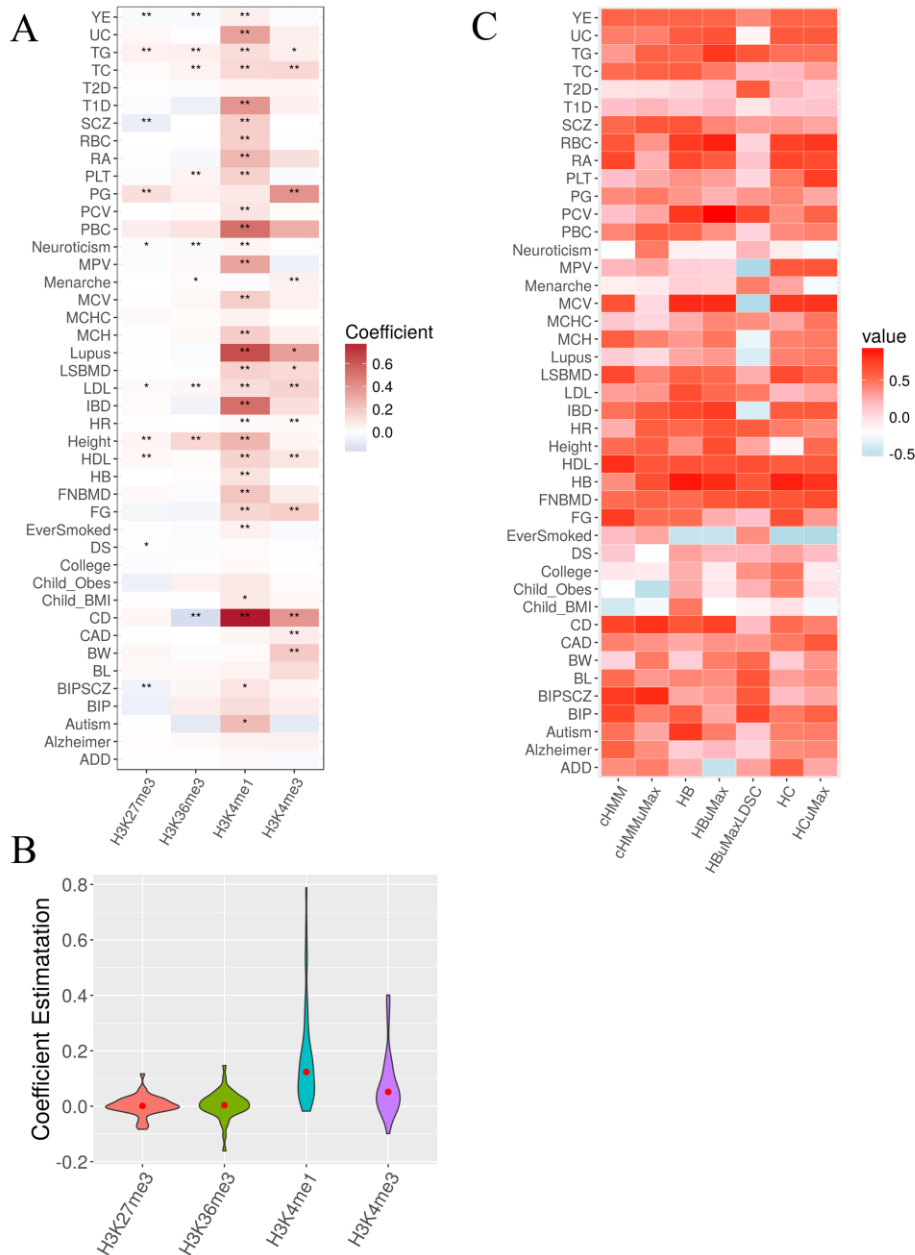

1175  
 1176 **Figure 3** Inferring tissue relevance for 43 GWAS traits using SNP annotations (A) Heatmap displays the annotation  
 1177 coefficient estimates for the four histone marks (y-axis) in the most trait relevant tissue for 43 traits (x-axis). Color  
 1178 captures the sign and magnitude of the estimates, while the number of stars represent the significance of the  
 1179 estimates after Bonferroni correlation for the  $43 * 10^4 = 1,720$  hypotheses tested (\*:  $p < 0.05$ ; \*\*:  $p < 0.01$ ). (B)  
 1180 Boxplot shows the coefficient estimates for the four histone marks in the most trait relevant tissue across 43 traits.  
 1181 (C) Heatmap displays correlation between different annotation integration approaches (y-axis) and the PubMed  
 1182 search approach for 43 GWAS traits (x-axis). For Uni and SMART approaches, correlations are computed between  
 1183 the average posterior probability vectors of the nine tissue groups from different annotation integration approaches  
 1184 and the proportion of existing publications on the same nine tissue groups from PubMed search; For UniMax\_LDSC  
 1185 approach, correlations are computed between the average Wald statistic vectors of the nine tissue groups and the  
 1186 proportion of existing publications on the same nine tissue groups from PubMed search. Color captures the sign and  
 1187 magnitude of the estimates.  
 1188



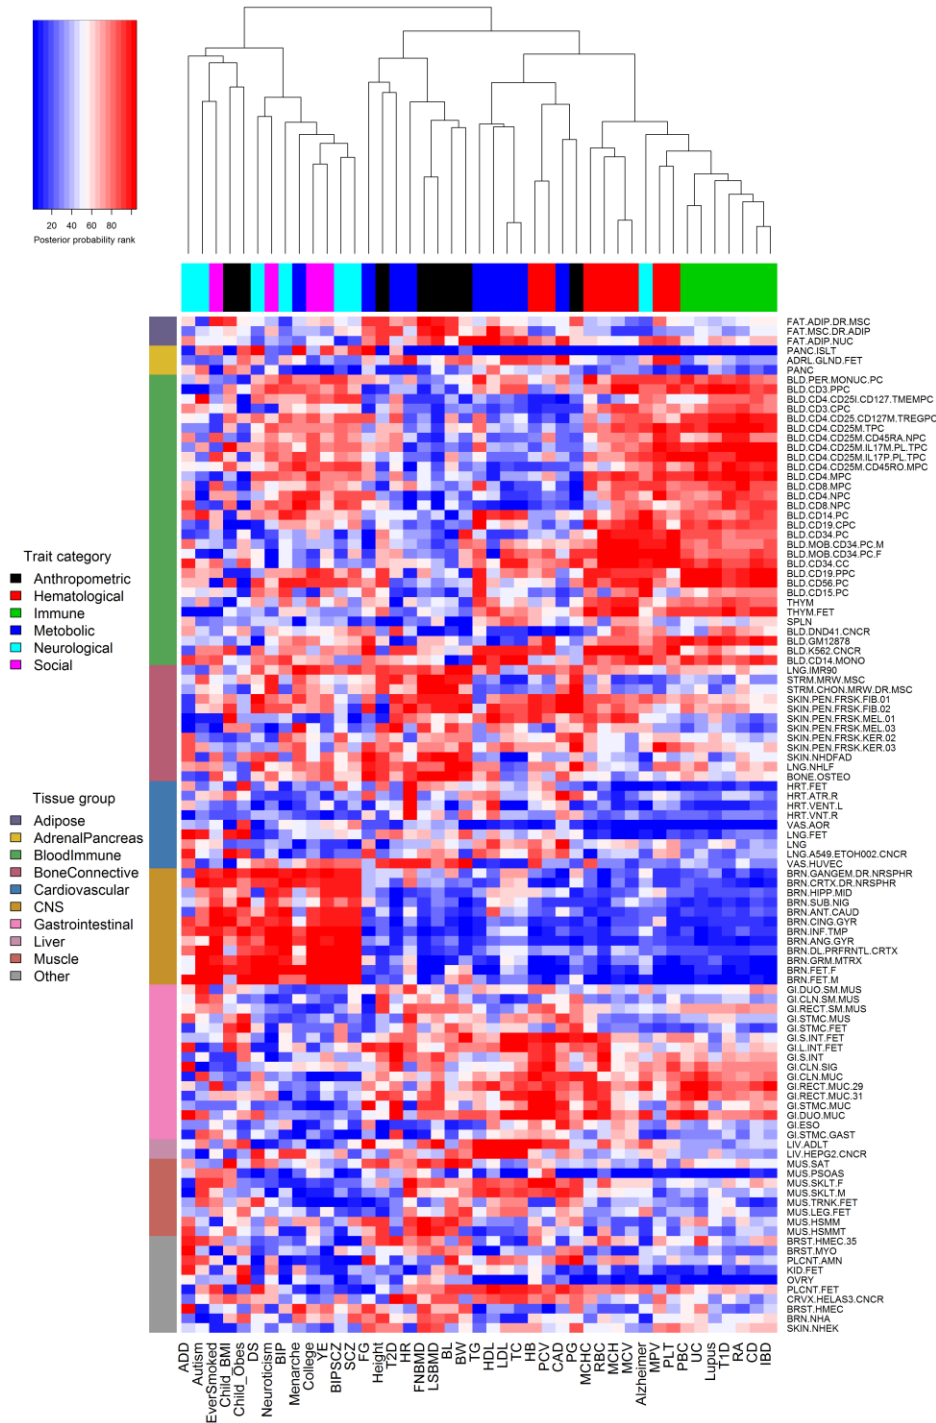

1189

1190

1191

**Figure 4** Heatmap displays the rank of 105 tissues (y-axis) in terms of their relevance for each of the 43 GWAS traits (x-axis). Traits are organized by hierarchical clustering. Tissues are organized into ten tissue groups.

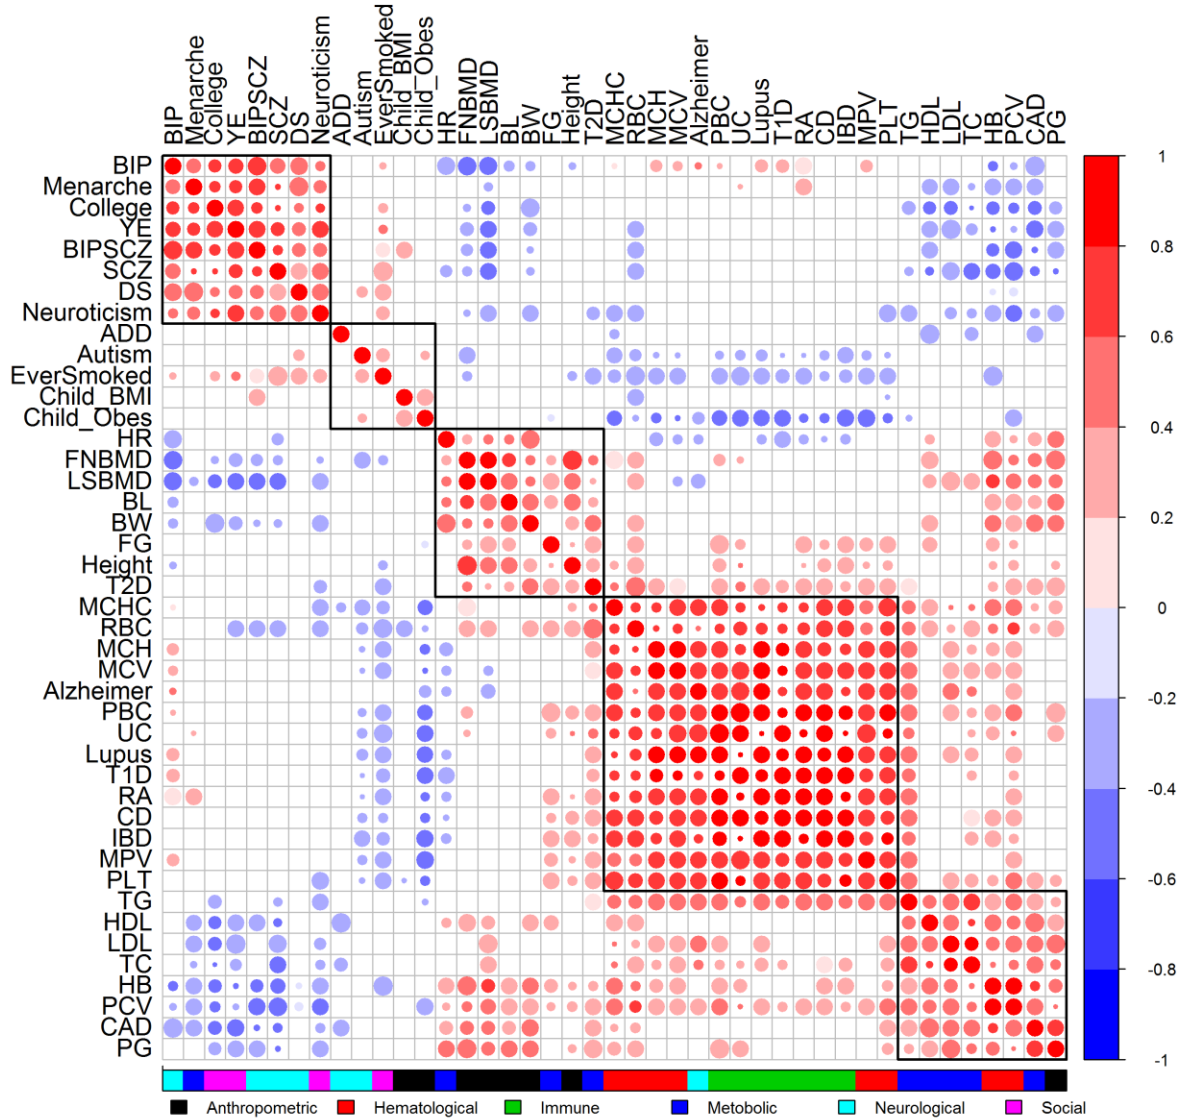

1192  
1193  
1194  
1195  
1196

**Figure 5** Correlation plot displays the relationship among 43 traits. Color of the circles in the correlation plot represents the sign and magnitude of the correlation coefficient (red: positive; blue: negative). No circle (while space) indicates no significant correlation ( $p > 0.05$ ). Size of the circle indicates significance (large:  $p < 0.001$ ; median:  $p < 0.01$ ; small:  $p < 0.05$ ).

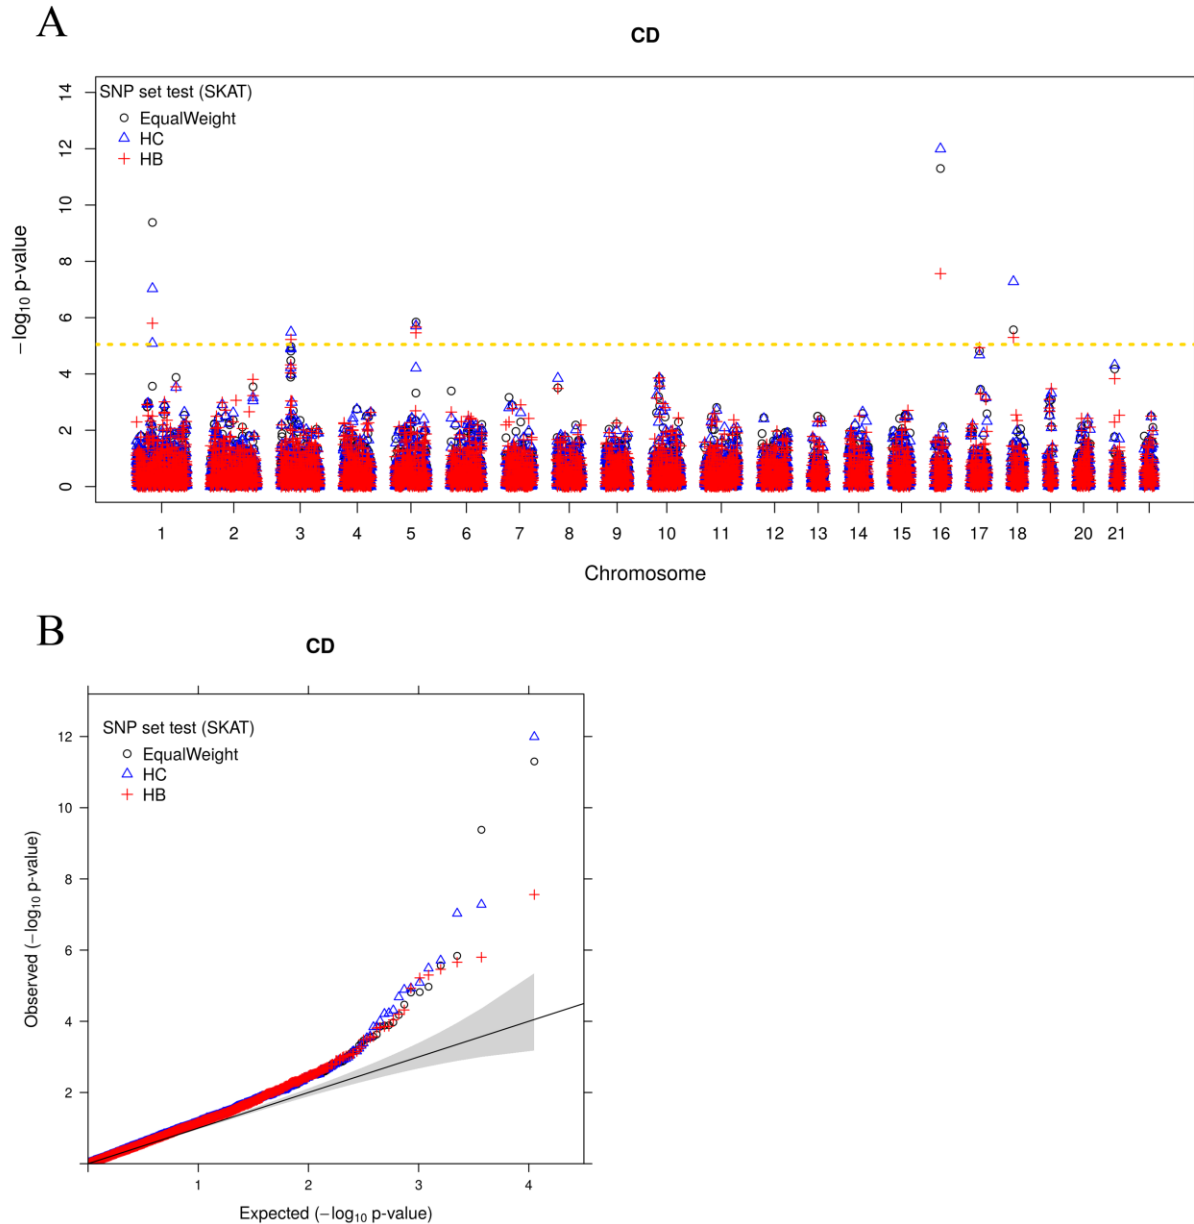

1197  
1198 **Figure 6** SNP set test results on Crohn's disease (CD) using different SNP weights. (A) Manhattan plot shows  
1199 association signal across genes (x-axis) detected by SNP set tests using three different sets of SNP weights.  
1200 EqualWeight (black): equal SNP weights. HC (red): SNP weights constructed using the estimated coefficient  
1201 parameters for continuous histone mark based annotations in the GWAS consortium study. HB (green): SNP weights  
1202 constructed using the estimated coefficient parameters for binary histone mark based annotations in the GWAS  
1203 consortium study. The gold dashed line represents genome-wide significance threshold ( $8.95 \times 10^{-6}$ ). (B) The same  
1204 results are displayed with QQ plot of  $-\log_{10}$  p-values. Grey shaded area represents the 95% point-wise confidence  
1205 interval.  
1206  
1207

## 1208 Supporting Information Legends

1209  
1210 **Figure S1** Simulation results for comparing using multiple annotations versus using a single annotation. Power to  
1211 detect trait-relevant tissues by different approaches in various settings at a fixed FDR of 0.05 (A), 0.1(B), or 0.2 (B).  
1212 x-axis shows the values of the two annotation coefficients used in the simulations. Settings where at least one  
1213 annotation coefficient is zero are shaded in grey. The setting where the annotation coefficients equal to the median  
1214 estimates from real data (i.e.  $\alpha = (0.1, 0.05)$ ) is shaded in gold.

1215  
1216 **Figure S2** Per-block PVE of the ten causal blocks for the second set simulations. (A) The cases of one informative  
1217 annotations at  $\alpha_0 = 0.5$  and  $(\alpha_1, \alpha_2) = (0.4, 0)$ ; (B) The cases of two informative annotations at  $\alpha_0 = 0.5$  and  
1218  $(\alpha_1, \alpha_2) = (0.4, 0.4)$ . The bar indicates the standard error across simulation replicates.

1219  
1220 **Figure S3** Various annotation characteristics influence the power in identifying trait-relevant tissues in simulations.  
1221 Methods for comparison include SMART (red), UniMax (green), and UniMaxLDSC (blue). Area under the curve  
1222 (AUC) is used to measure method performance. (A) Power to identify trait-relevant tissue generally increases with  
1223 increasingly large annotation coefficients when the two coefficients have the same sign. (B) Power also increases  
1224 with increasingly large annotation coefficients when the two coefficients have the opposite sign. (C) Power is  
1225 relatively stable with the genome coverage of the two annotations varied from 4%, 8% to 12%.

1226  
1227 **Figure S4** Various factors influence the power of SNP set analysis in simulations. Left columns (A, D, G):  
1228 annotation coefficients are fixed to be (1, 1) while the number of causal blocks changes from 5, 10, 20 to 50. Middle  
1229 columns (B, E, H): the number of causal blocks is fixed to be 10 while the annotation coefficients change from  
1230 (0.01, 0.01), (0.3, 0.3), (0.6, 0.6) to (1, 1). Right columns (C, F, I): per-block PVE are approximately fixed while the  
1231 number of causal blocks and annotation coefficients vary. Top rows (A, B, C) show the average proportion of  
1232 phenotype variance explained (PVE) by non-causal or causal blocks. Middle rows (D, E, F) show the fold  
1233 enrichment. Bottom rows (G, H, I) show SNP set analysis power for various methods.

1234  
1235 **Figure S5** Posterior probabilities of 10 tissue groups for being relevant to each of the 43 GWAS traits by HC. The  
1236 gold dashed line represents a horizontal line at 0.5.

1237  
1238 **Figure S6** Manhattan and QQ plots display the SNP set test results for five common diseases in WTCCC using  
1239 different SNP weights. Results are shown for rheumatoid arthritis (RA; A), cardiovascular disease (CAD; B), bipolar  
1240 disease (BIP; C), type II diabetes (T2D; D), and type I diabetes (T1D; E). For comparison, association results based  
1241 on univariate SNP tests are also shown in F-K. EqualWeight (black): equal SNP weights. *HC* (blue): SNP weights  
1242 constructed using the estimated coefficient parameters for continuous histone mark based annotations in a GWAS  
1243 consortium study. *HB* (red): SNP weights constructed using the estimated coefficient parameters for binary histone  
1244 mark based annotations in a GWAS consortium study. For Manhattan plots, gold dashed lines represent genome-  
1245 wide significance thresholds: 0.05/153,813 for univariate tests and 0.05/5,588 for SNP set tests. For QQ plots, grey  
1246 shaded area represents the 95% point-wise confidence interval.

1247  
1248 **Figure S7** Simulation results for SKAT. As the second set of the simulations, 10,000 individuals and 10,000 SNPs  
1249 were selected from GERA study. The SNPs were divided into 100 blocks with 100 SNPs in each block. Two histone  
1250 marks were simulated for 40% SNPs in the causal blocks of the trait-relevant tissue. Left panel (A, D, G): Fix the  
1251 annotation effect (1, 1) and change the number of causal blocks; Middle panel (B, E, H): Fix the number of causal  
1252 blocks 10, and the change the annotation effects (0.01, 0.01), (0.3, 0.3), (0.6, 0.6) and (1, 1); Right panel (C, F, I):  
1253 Fix the per-block PVE, and change the number of causal blocks and annotation effects.

1254  
1255

1256 **Table 1 Association results for SNP set tests in WTCCC using different SNP weights. Results are shown for 17**  
 1257 **genes identified to be significant by at least one SNP weighting option in four diseases from the WTCCC**  
 1258 **data (CD, RA, T1D and T2D). All these genes have been previously identified to be associated with the**  
 1259 **corresponding trait (cited references). Approaches that yield a p-value passing the genome-wide significance**  
 1260 **threshold ( $8.95 \times 10^{-6}$ ) are highlighted in bold.**

| Trait                | Gene                  | Chr      | Locus start | Locus end | Number of SNPs in gene | HC              | HCuMax          | HB              | HBuMax          | HBuMaxLDSC      | EqualWeight     |
|----------------------|-----------------------|----------|-------------|-----------|------------------------|-----------------|-----------------|-----------------|-----------------|-----------------|-----------------|
| CD                   | <i>CTorf141</i> [77]  | 1        | 67557859    | 67600639  | 18                     | <b>8.17e-06</b> | <b>4.99e-06</b> | 0.00316         | 0.00548         | <b>1.02E-08</b> | 0.000271        |
|                      | <i>IL23R</i> [82,83]  | 1        | 67632083    | 67725662  | 29                     | <b>9.33e-08</b> | <b>3.66e-07</b> | <b>1.58e-06</b> | <b>5.19e-09</b> | 0.000271        | <b>4.16e-10</b> |
|                      | <i>DAG1</i> [84]      | 3        | 49506146    | 49573048  | 15                     | 1.29E-05        | 1.35E-05        | 0.000911        | <b>2.84e-06</b> | <b>4.16E-10</b> | 1.55E-05        |
|                      | <i>BSN</i> [78]       | 3        | 49591922    | 49708978  | 26                     | <b>3.27e-06</b> | <b>2.22e-06</b> | <b>5.97e-06</b> | <b>1.43e-06</b> | 1.01E-05        | 1.07E-05        |
|                      | <i>SLC22A5</i> [78]   | 5        | 131705444   | 131731306 | 16                     | 6.14E-05        | 2.46E-05        | <b>3.47e-06</b> | <b>1.54e-06</b> | 8.98E-05        | 0.000477        |
|                      | <i>C5orf56</i> [85]   | 5        | 131746328   | 131811736 | 21                     | <b>1.96e-06</b> | <b>1.81e-06</b> | <b>2.17e-06</b> | <b>1.43e-06</b> | <b>1.68E-06</b> | <b>1.43e-06</b> |
|                      | <i>NOD2</i> [83]      | 16       | 50727514    | 50766988  | 11                     | <b>1.01e-12</b> | <b>6.24e-13</b> | <b>2.74e-08</b> | <b>1.51e-12</b> | <b>1.84E-06</b> | <b>5.04e-12</b> |
| <i>PTPN2</i> [86,87] | 18                    | 12785477 | 12884337    | 17        | <b>5.26e-08</b>        | <b>8.04e-08</b> | <b>5.05e-06</b> | <b>1.77e-07</b> | <b>1.50E-12</b> | <b>2.71e-06</b> |                 |
| RA                   | <i>MAGI3</i> [88]     | 1        | 113933371   | 114228545 | 53                     | <b>3.99e-06</b> | 3.44E-05        | <b>6.8e-06</b>  | 0.0117          | <b>4.66E-07</b> | <b>2.07e-06</b> |
|                      | <i>RSBN1</i> [89]     | 1        | 114304454   | 114355098 | 12                     | <b>8.07e-07</b> | <b>8.85e-07</b> | <b>9.36e-07</b> | <b>6.89e-07</b> | <b>2.55E-06</b> | <b>3.01e-07</b> |
|                      | <i>PTPN22</i> [82,86] | 1        | 114356433   | 114414381 | 17                     | <b>5.09e-06</b> | <b>2.24e-06</b> | <b>7.43e-07</b> | <b>7.44e-07</b> | <b>9.68E-08</b> | <b>2.02e-07</b> |
| T1D                  | <i>MAGI3</i> [90]     | 1        | 113933371   | 114228545 | 53                     | <b>6.16e-08</b> | <b>1.21e-07</b> | <b>9.65e-09</b> | <b>4.4e-07</b>  | <b>1.95E-07</b> | <b>7.47e-10</b> |
|                      | <i>RSBN1</i> [91]     | 1        | 114304454   | 114355098 | 12                     | <b>8.89e-08</b> | <b>1.04e-07</b> | <b>2.46e-07</b> | <b>9.63e-08</b> | <b>8.47E-10</b> | <b>6.76e-08</b> |
|                      | <i>PTPN22</i> [91]    | 1        | 114356433   | 114414381 | 17                     | <b>9.22e-07</b> | <b>7.18e-07</b> | <b>2.28e-06</b> | <b>1.29e-07</b> | <b>4.10E-08</b> | <b>2.81e-08</b> |
|                      | <i>CLEC16A</i> [92]   | 16       | 11038345    | 11276046  | 55                     | <b>3.49e-07</b> | <b>3.42e-07</b> | <b>2.26e-07</b> | <b>3.19e-07</b> | <b>3.27E-08</b> | <b>7.69e-07</b> |
| T2D                  | <i>TSPAN8</i> [93]    | 12       | 71518865    | 71835678  | 38                     | <b>8.64e-06</b> | 1.01E-05        | <b>3.29e-06</b> | <b>2.84e-06</b> | <b>9.10E-07</b> | <b>8.26e-07</b> |
|                      | <i>FTO</i> [79]       | 16       | 53737875    | 54155853  | 61                     | <b>2.6e-06</b>  | <b>1.05e-06</b> | <b>6.16e-06</b> | 8.43E-05        | 0.000152        | 0.000245        |
| <b>Total</b>         |                       |          |             |           |                        | <b>15</b>       | <b>13</b>       | <b>15</b>       | <b>14</b>       | <b>14</b>       | <b>12</b>       |

1261  
 1262 **Table S1** Information for the tissue-specific SNP annotations obtained based on histone occupancy data in the  
 1263 ENCODE and Roadmap projects. The table lists ID, tissue group, epigenome name and mnemonic, tissue types, and  
 1264 genome-wide percentage of mark occupancy for the four histone marks (H3K27me3, H3K36m3, H3K4me1,  
 1265 H3K4me3).

1266  
 1267 **Table S2** Information for the summary statistics of 43 traits from 29 GWAS studies. The table lists the phenotype  
 1268 name, category, abbreviation, number of individuals, reference, and downloaded websites for each of the 43 traits.

1269  
 1270 **Table S3** The most relevant tissue group for each trait determined by various methods. Parenthesis shows either the  
 1271 proportion of existing publications for the tissue group (for PubMed search), the tissue group level posterior  
 1272 probability for other approaches (HC, HCuMax, HB, HBuMax, Chmm, cHMMuMax), or the tissue group level  
 1273 Wald statistics for HBuMaxLDSC.

1274  
 1275 **Table S4** PubMed search results show the number (in parenthesis) and the normalized proportion of publications on  
 1276 each pair of tissue group (columns) and trait (rows). The PubMed search was performed on June 23, 2017. For each  
 1277 GWAS trait, the tissue group with the largest proportion of existing publications are highlighted in red. The  
 1278 proportion values in each row sum to one.

1279  
 1280 **Table S5** The posterior probability of 105 tissues with four histone marks for 43 complex traits inferred by SMART.

1281  
 1282
